# Supplementary material for: Genomic Epidemiology Reveals the Circulation of the Chikungunya Virus East/Central/South African Lineage in Tocantins State, North Brazil
Source: MDPI journal article supplement (doi:10.3390/v14102311), 2022-10-21
Supplement: s1 [file s1]

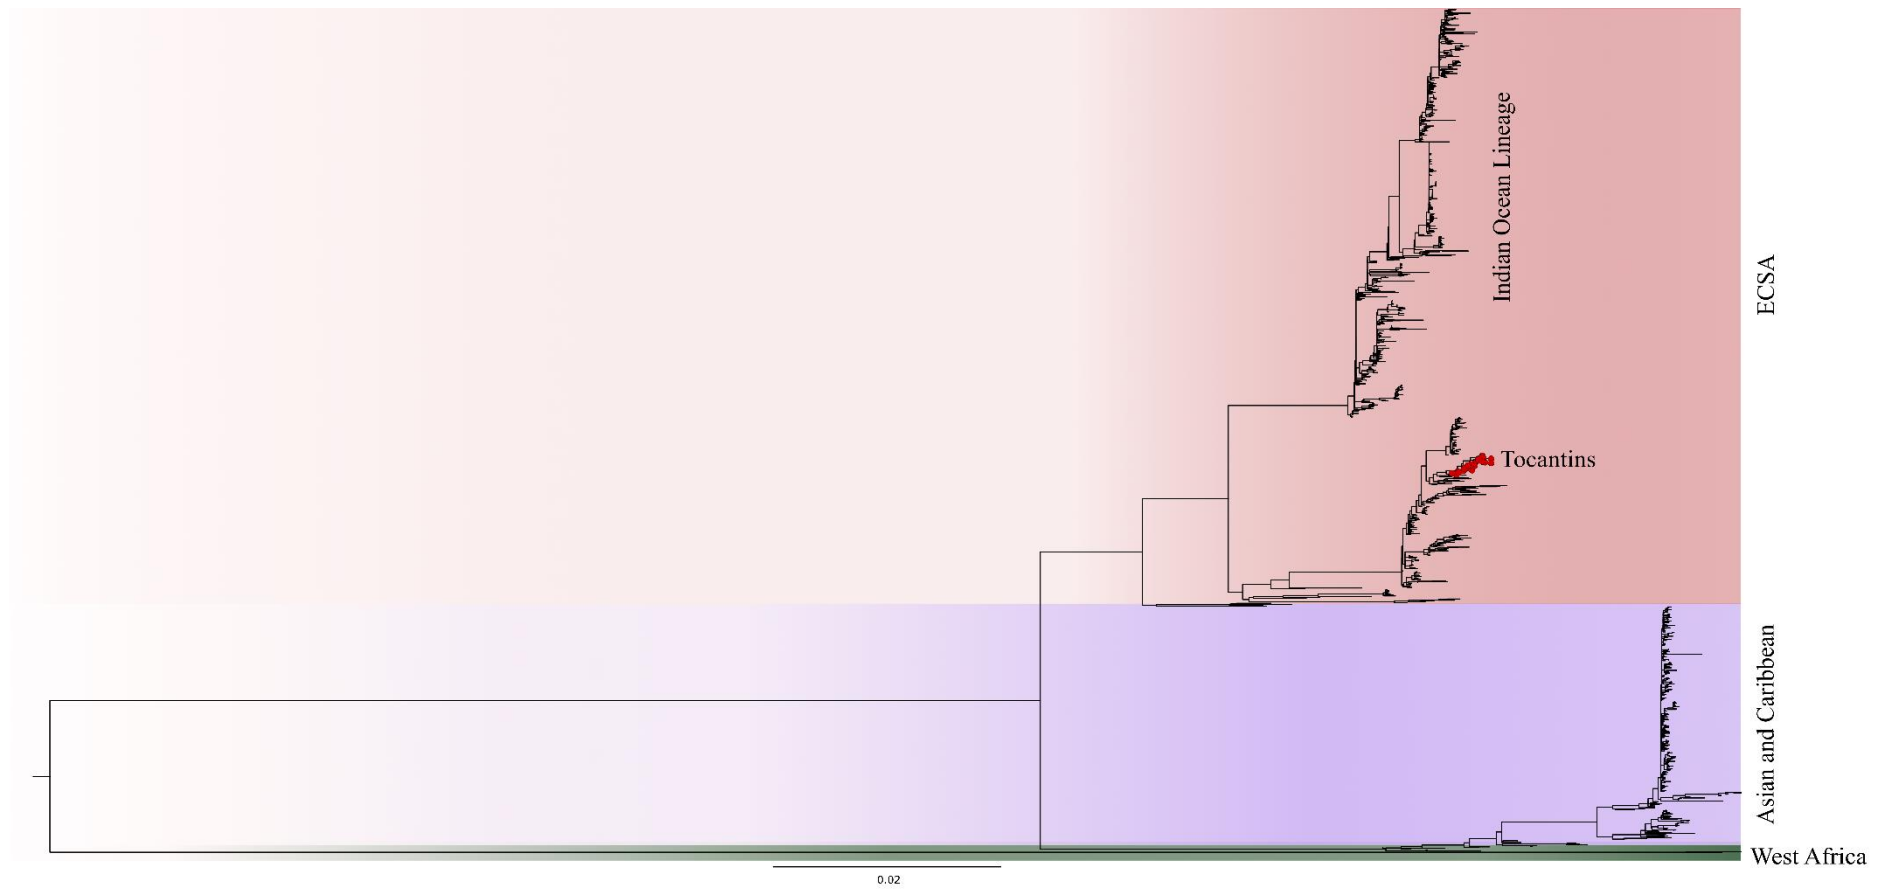

**Figure S1.** Maximum-likelihood tree of 1,156 genomic sequences representing the West Africa, ECSA and Asian and Caribbean genotypes.

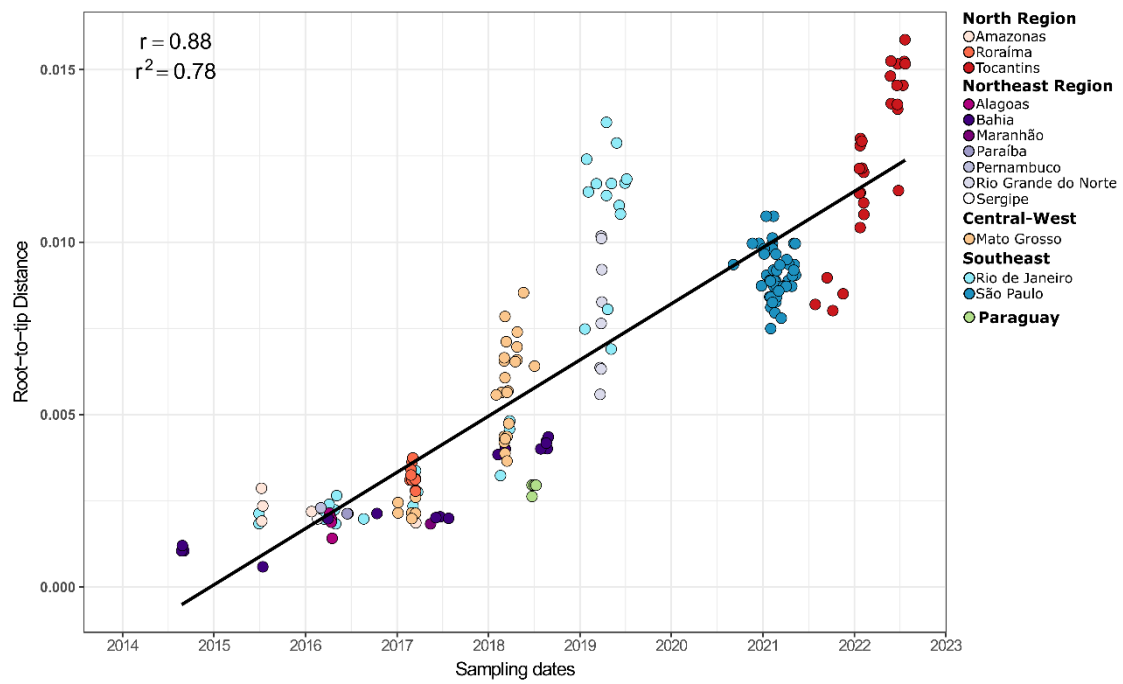

**Figure S2.** Root-to-tip regression of genetic distances and sampling dates for 186 Brazilian ECSA genomes in the final dataset. Correlation coefficient ( $r$ ) and  $r$  squared are depicted above the graph.

**Table S1.** Sequences of the Chikungunya virus global dataset used in the Maximum Likelihood phylogeny.

| Accession  | Lineage             | Date       | Accession  | Lineage                    | Date       |
|------------|---------------------|------------|------------|----------------------------|------------|
| HM045810.1 | Asian and Caribbean | 1905-05-11 | MH647198.1 | East-Central-South-African | 2013-10-01 |
| MK028840.1 | Asian and Caribbean | 1905-05-15 | KJ579184.1 | East-Central-South-African | 2013-10-14 |
| HM045788.1 | Asian and Caribbean | 1905-05-26 | KJ579185.1 | East-Central-South-African | 2013-10-14 |
| HM045814.1 | Asian and Caribbean | 1905-05-28 | KJ579186.1 | East-Central-South-African | 2013-10-14 |
| HM045808.1 | Asian and Caribbean | 1905-05-31 | KJ579187.1 | East-Central-South-African | 2013-10-14 |
| HM045791.1 | Asian and Caribbean | 1905-06-05 | MH647199.1 | East-Central-South-African | 2013-12-01 |
| HM045797.1 | Asian and Caribbean | 1905-06-07 | MH647200.1 | East-Central-South-African | 2013-12-01 |
| HM045800.1 | Asian and Caribbean | 1905-06-07 | MH647201.1 | East-Central-South-African | 2013-12-01 |
| KX262988.1 | Asian and Caribbean | 1905-06-10 | MH647202.1 | East-Central-South-African | 2014-01-01 |
| HM045789.1 | Asian and Caribbean | 1905-06-10 | MH647204.1 | East-Central-South-African | 2014-02-01 |
| HM045787.1 | Asian and Caribbean | 1905-06-17 | MH647203.1 | East-Central-South-African | 2014-02-02 |
| HM045796.1 | Asian and Caribbean | 1905-06-17 | MH647205.1 | East-Central-South-African | 2014-04-01 |
| KX262987.1 | Asian and Caribbean | 1905-06-18 | MT526803.1 | East-Central-South-African | 2014-05-23 |
| KX168429.1 | Asian and Caribbean | 1905-07-01 | MH647206.1 | East-Central-South-African | 2014-06-01 |
| MG664851.1 | Asian and Caribbean | 1905-07-04 | KX619422.1 | East-Central-South-African | 2014-07-08 |
| KT308159.1 | Asian and Caribbean | 1905-07-04 | KX619423.1 | East-Central-South-African | 2014-07-23 |
| KT308160.1 | Asian and Caribbean | 1905-07-04 | MT526802.1 | East-Central-South-African | 2014-08-20 |
| KT308161.1 | Asian and Caribbean | 1905-07-04 | KP164568.1 | East-Central-South-African | 2014-08-26 |
| KT308162.1 | Asian and Caribbean | 1905-07-04 | KP164569.1 | East-Central-South-African | 2014-08-28 |
| KT308163.1 | Asian and Caribbean | 1905-07-04 | KP164570.1 | East-Central-South-African | 2014-09-03 |
| KC488650.1 | Asian and Caribbean | 1905-07-04 | MW042254.1 | East-Central-South-African | 2014-10-01 |
| MT228633.1 | Asian and Caribbean | 1905-07-05 | MK121891.1 | East-Central-South-African | 2015-07-15 |
| KX262991.1 | Asian and Caribbean | 1905-07-05 | MK121892.1 | East-Central-South-African | 2015-07-15 |
| AB860301.3 | Asian and Caribbean | 1905-07-05 | MK121893.1 | East-Central-South-African | 2015-07-15 |
| KY575565.1 | Asian and Caribbean | 1905-07-06 | KU940225.1 | East-Central-South-African | 2015-07-15 |
| KY575566.1 | Asian and Caribbean | 1905-07-06 | KU940226.1 | East-Central-South-African | 2015-08-01 |
| KY575569.1 | Asian and Caribbean | 1905-07-06 | MT526801.1 | East-Central-South-African | 2015-09-02 |
| KY575572.1 | Asian and Caribbean | 1905-07-06 | MH647207.1 | East-Central-South-African | 2015-10-01 |
| KY575573.1 | Asian and Caribbean | 1905-07-06 | MT526807.1 | East-Central-South-African | 2016-01-26 |
| KU365369.1 | Asian and Caribbean | 1905-07-06 | MK121894.1 | East-Central-South-African | 2016-01-31 |
| KY272961.1 | Asian and Caribbean | 1905-07-06 | MK244635.1 | East-Central-South-African | 2016-02-19 |
| KY272962.1 | Asian and Caribbean | 1905-07-06 | KY055011.1 | East-Central-South-African | 2016-02-20 |
| KY272963.1 | Asian and Caribbean | 1905-07-06 | KX228391.1 | East-Central-South-African | 2016-03-03 |
| KY272964.1 | Asian and Caribbean | 1905-07-06 | KY124328.1 | East-Central-South-African | 2016-03-16 |
| KY272965.1 | Asian and Caribbean | 1905-07-06 | KY124329.1 | East-Central-South-African | 2016-03-16 |
| KY272966.1 | Asian and Caribbean | 1905-07-06 | MG649983.1 | East-Central-South-African | 2016-03-28 |
| KY272967.1 | Asian and Caribbean | 1905-07-06 | MG649970.1 | East-Central-South-African | 2016-03-29 |
| KY272968.1 | Asian and Caribbean | 1905-07-06 | MG649976.1 | East-Central-South-African | 2016-03-29 |
| KY272969.1 | Asian and Caribbean | 1905-07-06 | MN783352.1 | East-Central-South-African | 2016-04-01 |
| KY272970.1 | Asian and Caribbean | 1905-07-06 | MK244632.1 | East-Central-South-African | 2016-04-05 |
| KT581023.1 | Asian and Caribbean | 1905-07-06 | MK244638.1 | East-Central-South-African | 2016-04-05 |
| KT327164.1 | Asian and Caribbean | 1905-07-06 | KY704952.1 | East-Central-South-African | 2016-04-07 |
| KX097982.1 | Asian and Caribbean | 1905-07-07 | MG649974.1 | East-Central-South-African | 2016-04-08 |
| KX097986.1 | Asian and Caribbean | 1905-07-07 | KY704947.1 | East-Central-South-African | 2016-04-15 |

| Accession  | Lineage             | Date       | Accession  | Lineage                    | Date       |
|------------|---------------------|------------|------------|----------------------------|------------|
| KX097988.1 | Asian and Caribbean | 1905-07-07 | KY704942.1 | East-Central-South-African | 2016-04-16 |
| MF001507.1 | Asian and Caribbean | 1905-07-07 | KY704939.1 | East-Central-South-African | 2016-04-17 |
| MF001508.1 | Asian and Caribbean | 1905-07-07 | MK244639.1 | East-Central-South-African | 2016-04-19 |
| MF001510.1 | Asian and Caribbean | 1905-07-07 | MK244634.1 | East-Central-South-African | 2016-04-27 |
| MF001512.1 | Asian and Caribbean | 1905-07-07 | MG649980.1 | East-Central-South-African | 2016-04-27 |
| MF001513.1 | Asian and Caribbean | 1905-07-07 | MK244636.1 | East-Central-South-African | 2016-05-02 |
| KU355832.1 | Asian and Caribbean | 1905-07-07 | MG649972.1 | East-Central-South-African | 2016-05-05 |
| HM045803.1 | Asian and Caribbean | 1963-11-06 | MK244633.1 | East-Central-South-African | 2016-05-06 |
| HM045813.1 | Asian and Caribbean | 1963-11-06 | MH423797.1 | East-Central-South-African | 2016-05-07 |
| HM045790.1 | Asian and Caribbean | 1985-07-17 | MH423798.1 | East-Central-South-African | 2016-05-08 |
| FN295483.3 | Asian and Caribbean | 2006-03-01 | MK244637.1 | East-Central-South-African | 2016-05-10 |
| FN295484.2 | Asian and Caribbean | 2006-03-01 | LC259094.1 | East-Central-South-African | 2016-05-11 |
| LC259083.1 | Asian and Caribbean | 2009-09-11 | MG000876.1 | East-Central-South-African | 2016-05-17 |
| MH670649.1 | Asian and Caribbean | 2009-11-19 | MH423799.1 | East-Central-South-African | 2016-05-31 |
| HE806461.1 | Asian and Caribbean | 2011-02-28 | MH423800.1 | East-Central-South-African | 2016-05-31 |
| KY435454.1 | Asian and Caribbean | 2011-11-01 | MH423801.1 | East-Central-South-African | 2016-05-31 |
| MH647183.1 | Asian and Caribbean | 2012-04-01 | MH423802.1 | East-Central-South-African | 2016-05-31 |
| LC259084.1 | Asian and Caribbean | 2012-09-25 | MH423803.1 | East-Central-South-African | 2016-05-31 |
| LC259085.1 | Asian and Caribbean | 2012-10-15 | MH423810.1 | East-Central-South-African | 2016-05-31 |
| MH647185.1 | Asian and Caribbean | 2012-11-01 | MH423804.1 | East-Central-South-African | 2016-06-01 |
| KY883764.1 | Asian and Caribbean | 2013-01-01 | MH423805.1 | East-Central-South-African | 2016-06-01 |
| KM673291.1 | Asian and Caribbean | 2013-01-01 | MH423806.1 | East-Central-South-African | 2016-06-01 |
| MH647193.1 | Asian and Caribbean | 2013-05-01 | KY704955.1 | East-Central-South-African | 2016-06-17 |
| LC259087.1 | Asian and Caribbean | 2013-07-06 | KY704954.1 | East-Central-South-African | 2016-06-20 |
| KF872195.1 | Asian and Caribbean | 2013-09-24 | MG000875.1 | East-Central-South-African | 2016-06-27 |
| KX262992.1 | Asian and Caribbean | 2014-01-05 | MG137428.1 | East-Central-South-African | 2016-06-29 |
| KX262994.1 | Asian and Caribbean | 2014-01-21 | MG649975.1 | East-Central-South-African | 2016-07-27 |
| KY435486.1 | Asian and Caribbean | 2014-01-23 | MG649977.1 | East-Central-South-African | 2016-07-28 |
| KY435485.1 | Asian and Caribbean | 2014-01-28 | MG649981.1 | East-Central-South-African | 2016-07-28 |
| KY435484.1 | Asian and Caribbean | 2014-01-30 | MG649971.1 | East-Central-South-African | 2016-08-22 |
| KY435483.1 | Asian and Caribbean | 2014-02-12 | MK473625.1 | East-Central-South-African | 2016-08-26 |
| KY435482.1 | Asian and Caribbean | 2014-03-11 | MF503628.1 | East-Central-South-African | 2016-08-26 |
| KU365368.1 | Asian and Caribbean | 2014-03-26 | KY057363.1 | East-Central-South-African | 2016-08-28 |
| KY435481.1 | Asian and Caribbean | 2014-04-22 | MK473621.1 | East-Central-South-African | 2016-09-02 |
| KY435480.1 | Asian and Caribbean | 2014-04-27 | MK473635.1 | East-Central-South-African | 2016-09-02 |
| KY435479.1 | Asian and Caribbean | 2014-04-28 | MK473631.1 | East-Central-South-African | 2016-09-11 |
| KY680390.1 | Asian and Caribbean | 2014-05-07 | MK473622.1 | East-Central-South-African | 2016-09-13 |
| KY680354.1 | Asian and Caribbean | 2014-05-08 | MF499120.1 | East-Central-South-African | 2016-09-15 |
| KY680347.1 | Asian and Caribbean | 2014-05-13 | MK473632.1 | East-Central-South-African | 2016-09-17 |
| KY680352.1 | Asian and Caribbean | 2014-05-15 | MK473623.1 | East-Central-South-African | 2016-09-20 |
| KY680364.1 | Asian and Caribbean | 2014-05-15 | MK473636.1 | East-Central-South-African | 2016-09-20 |
| KY435478.1 | Asian and Caribbean | 2014-05-17 | MK473637.1 | East-Central-South-African | 2016-09-20 |
| KY435474.1 | Asian and Caribbean | 2014-05-19 | MK473638.1 | East-Central-South-African | 2016-09-20 |
| KY435473.1 | Asian and Caribbean | 2014-05-22 | MK518340.1 | East-Central-South-African | 2016-09-28 |
| KY435475.1 | Asian and Caribbean | 2014-05-22 | MK551552.1 | East-Central-South-African | 2016-09-30 |
| KY680361.1 | Asian and Caribbean | 2014-05-26 | MK159124.1 | East-Central-South-African | 2016-10-03 |
| KP851710.1 | Asian and Caribbean | 2014-05-30 | MK551553.1 | East-Central-South-African | 2016-10-03 |

| Accession  | Lineage             | Date       | Accession  | Lineage                    | Date       |
|------------|---------------------|------------|------------|----------------------------|------------|
| KY435477.1 | Asian and Caribbean | 2014-05-31 | MK473626.1 | East-Central-South-African | 2016-10-06 |
| KY680375.1 | Asian and Caribbean | 2014-06-04 | MK159127.1 | East-Central-South-African | 2016-10-10 |
| KY435476.1 | Asian and Caribbean | 2014-06-05 | MN783353.1 | East-Central-South-African | 2016-10-13 |
| KY435471.1 | Asian and Caribbean | 2014-06-11 | MK473628.1 | East-Central-South-African | 2016-10-13 |
| KY680363.1 | Asian and Caribbean | 2014-06-15 | MK473629.1 | East-Central-South-African | 2016-10-18 |
| KY435472.1 | Asian and Caribbean | 2014-06-16 | MK473640.1 | East-Central-South-African | 2016-10-18 |
| KY680351.1 | Asian and Caribbean | 2014-06-24 | MK473633.1 | East-Central-South-African | 2016-10-19 |
| KY680384.1 | Asian and Caribbean | 2014-06-25 | MT666072.1 | East-Central-South-African | 2016-10-20 |
| KY680408.1 | Asian and Caribbean | 2014-06-26 | MK473624.1 | East-Central-South-African | 2016-10-23 |
| KY680349.1 | Asian and Caribbean | 2014-07-02 | MK473627.1 | East-Central-South-African | 2016-10-23 |
| KY435460.1 | Asian and Caribbean | 2014-07-06 | MK473639.1 | East-Central-South-African | 2016-10-23 |
| KY435470.1 | Asian and Caribbean | 2014-07-08 | MG649973.1 | East-Central-South-African | 2016-12-12 |
| KY680400.1 | Asian and Caribbean | 2014-07-15 | MH823663.1 | East-Central-South-African | 2017-01-05 |
| KR264950.1 | Asian and Caribbean | 2014-07-16 | MH823668.1 | East-Central-South-African | 2017-01-05 |
| KY680395.1 | Asian and Caribbean | 2014-07-21 | MK121897.1 | East-Central-South-African | 2017-02-20 |
| KY680355.1 | Asian and Caribbean | 2014-07-22 | MK121898.1 | East-Central-South-African | 2017-02-22 |
| KY435467.1 | Asian and Caribbean | 2014-07-24 | MK121906.1 | East-Central-South-African | 2017-02-27 |
| KY435469.1 | Asian and Caribbean | 2014-07-30 | MK121907.1 | East-Central-South-African | 2017-02-27 |
| KY435463.1 | Asian and Caribbean | 2014-08-02 | MH823666.1 | East-Central-South-African | 2017-03-01 |
| KY680360.1 | Asian and Caribbean | 2014-08-05 | MH823667.1 | East-Central-South-African | 2017-03-01 |
| KY680398.1 | Asian and Caribbean | 2014-08-05 | MK121904.1 | East-Central-South-African | 2017-03-02 |
| KY435466.1 | Asian and Caribbean | 2014-08-06 | MK121905.1 | East-Central-South-African | 2017-03-02 |
| KY435468.1 | Asian and Caribbean | 2014-08-06 | MK121896.1 | East-Central-South-African | 2017-03-03 |
| KY680406.1 | Asian and Caribbean | 2014-08-08 | MK121908.1 | East-Central-South-African | 2017-03-05 |
| KY680357.1 | Asian and Caribbean | 2014-08-09 | MK244640.1 | East-Central-South-African | 2017-03-07 |
| KY435464.1 | Asian and Caribbean | 2014-08-15 | MK244641.1 | East-Central-South-African | 2017-03-09 |
| KY680377.1 | Asian and Caribbean | 2014-08-16 | MK121903.1 | East-Central-South-African | 2017-03-15 |
| KY435456.1 | Asian and Caribbean | 2014-08-17 | MH823664.1 | East-Central-South-African | 2017-03-16 |
| KY435465.1 | Asian and Caribbean | 2014-08-17 | MH823665.1 | East-Central-South-African | 2017-03-16 |
| KY680371.1 | Asian and Caribbean | 2014-08-20 | MG649978.1 | East-Central-South-African | 2017-03-16 |
| KY680410.1 | Asian and Caribbean | 2014-08-22 | MK121899.1 | East-Central-South-African | 2017-03-17 |
| KY435461.1 | Asian and Caribbean | 2014-08-24 | MK121900.1 | East-Central-South-African | 2017-03-17 |
| KY435462.1 | Asian and Caribbean | 2014-08-25 | MK121901.1 | East-Central-South-African | 2017-03-17 |
| KY680353.1 | Asian and Caribbean | 2014-08-25 | MK121902.1 | East-Central-South-African | 2017-03-17 |
| KY680412.1 | Asian and Caribbean | 2014-08-28 | MK121895.1 | East-Central-South-African | 2017-03-20 |
| KP164567.1 | Asian and Caribbean | 2014-08-28 | MG649982.1 | East-Central-South-African | 2017-03-24 |
| KY680396.1 | Asian and Caribbean | 2014-09-02 | MT526806.1 | East-Central-South-African | 2017-04-03 |
| KY680399.1 | Asian and Caribbean | 2014-09-05 | MH349097.1 | East-Central-South-African | 2017-04-30 |
| MH329296.1 | Asian and Caribbean | 2014-09-13 | MK518395.1 | East-Central-South-African | 2017-05-16 |
| KY680414.1 | Asian and Caribbean | 2014-09-13 | MK468611.1 | East-Central-South-African | 2017-05-31 |
| KY680379.1 | Asian and Caribbean | 2014-09-16 | MK468623.1 | East-Central-South-African | 2017-05-31 |
| KY435459.1 | Asian and Caribbean | 2014-09-17 | MK468625.1 | East-Central-South-African | 2017-05-31 |
| KY680413.1 | Asian and Caribbean | 2014-09-17 | MH647208.1 | East-Central-South-African | 2017-06-01 |
| KY680365.1 | Asian and Caribbean | 2014-09-18 | MK752955.1 | East-Central-South-African | 2017-06-05 |
| KY680401.1 | Asian and Caribbean | 2014-09-22 | MK468624.1 | East-Central-South-African | 2017-06-14 |
| KY680386.1 | Asian and Caribbean | 2014-09-24 | MK468608.1 | East-Central-South-African | 2017-06-17 |
| MH329303.1 | Asian and Caribbean | 2014-10-01 | MK468612.1 | East-Central-South-African | 2017-06-17 |

| Accession  | Lineage             | Date       | Accession  | Lineage                    | Date       |
|------------|---------------------|------------|------------|----------------------------|------------|
| KY680388.1 | Asian and Caribbean | 2014-10-02 | MK468626.1 | East-Central-South-African | 2017-06-17 |
| KY680370.1 | Asian and Caribbean | 2014-10-03 | MK468609.1 | East-Central-South-African | 2017-06-19 |
| KY703904.1 | Asian and Caribbean | 2014-10-04 | MK468616.1 | East-Central-South-African | 2017-06-19 |
| KY680394.1 | Asian and Caribbean | 2014-10-05 | MK468617.1 | East-Central-South-African | 2017-06-21 |
| KY680376.1 | Asian and Caribbean | 2014-10-08 | MK752954.1 | East-Central-South-African | 2017-06-22 |
| KU365366.1 | Asian and Caribbean | 2014-10-09 | MK468613.1 | East-Central-South-African | 2017-06-24 |
| KY680380.1 | Asian and Caribbean | 2014-10-13 | MK468618.1 | East-Central-South-African | 2017-06-29 |
| KY680387.1 | Asian and Caribbean | 2014-10-14 | LC580236.1 | East-Central-South-African | 2017-07-01 |
| MH329294.1 | Asian and Caribbean | 2014-10-15 | LC580237.1 | East-Central-South-African | 2017-07-01 |
| KP851709.1 | Asian and Caribbean | 2014-10-15 | LC580238.1 | East-Central-South-African | 2017-07-01 |
| KY680378.1 | Asian and Caribbean | 2014-10-19 | LC580239.1 | East-Central-South-African | 2017-07-01 |
| KY680392.1 | Asian and Caribbean | 2014-10-19 | MK468619.1 | East-Central-South-African | 2017-07-08 |
| KY680381.1 | Asian and Caribbean | 2014-10-21 | MK468614.1 | East-Central-South-African | 2017-07-10 |
| KY680409.1 | Asian and Caribbean | 2014-10-21 | MK468615.1 | East-Central-South-African | 2017-07-10 |
| KY680373.1 | Asian and Caribbean | 2014-10-22 | MK468620.1 | East-Central-South-African | 2017-07-11 |
| KY680391.1 | Asian and Caribbean | 2014-10-24 | MK468621.1 | East-Central-South-African | 2017-07-18 |
| KY703940.1 | Asian and Caribbean | 2014-10-28 | MT526805.1 | East-Central-South-African | 2017-07-19 |
| KY703956.1 | Asian and Caribbean | 2014-10-28 | MK752951.1 | East-Central-South-African | 2017-07-27 |
| KY435457.1 | Asian and Caribbean | 2014-10-30 | LC580240.1 | East-Central-South-African | 2017-08-01 |
| KT192707.1 | Asian and Caribbean | 2014-10-31 | MK120197.1 | East-Central-South-African | 2017-08-02 |
| MH329293.1 | Asian and Caribbean | 2014-11-01 | MK120198.1 | East-Central-South-African | 2017-08-02 |
| MH329295.1 | Asian and Caribbean | 2014-11-01 | MK120199.1 | East-Central-South-African | 2017-08-02 |
| MT038405.1 | Asian and Caribbean | 2014-11-03 | MK120200.1 | East-Central-South-African | 2017-08-09 |
| KY435458.1 | Asian and Caribbean | 2014-11-03 | MK752953.1 | East-Central-South-African | 2017-08-16 |
| KY703954.1 | Asian and Caribbean | 2014-11-05 | MK752950.1 | East-Central-South-African | 2017-08-23 |
| MK134713.1 | Asian and Caribbean | 2014-11-11 | MK752958.1 | East-Central-South-African | 2017-08-23 |
| KY435455.1 | Asian and Caribbean | 2014-11-12 | MH400249.1 | East-Central-South-African | 2017-08-23 |
| KY703947.1 | Asian and Caribbean | 2014-11-19 | MK752952.1 | East-Central-South-African | 2017-08-30 |
| KY680407.1 | Asian and Caribbean | 2014-11-20 | MK752956.1 | East-Central-South-African | 2017-08-30 |
| KY703981.1 | Asian and Caribbean | 2014-11-21 | MG912993.1 | East-Central-South-African | 2017-08-30 |
| KY680385.1 | Asian and Caribbean | 2014-11-25 | MK468622.1 | East-Central-South-African | 2017-08-31 |
| KY703950.1 | Asian and Caribbean | 2014-11-25 | MT123008.1 | East-Central-South-African | 2017-09-01 |
| KY703984.1 | Asian and Caribbean | 2014-11-27 | MT123009.1 | East-Central-South-African | 2017-09-01 |
| KY703988.1 | Asian and Caribbean | 2014-11-27 | MT123010.1 | East-Central-South-African | 2017-09-01 |
| MT038404.1 | Asian and Caribbean | 2014-11-30 | LC580241.1 | East-Central-South-African | 2017-09-01 |
| MT591085.1 | Asian and Caribbean | 2014-12-01 | LC580242.1 | East-Central-South-African | 2017-09-01 |
| KY680368.1 | Asian and Caribbean | 2014-12-01 | LC580243.1 | East-Central-South-African | 2017-09-01 |
| KU365373.1 | Asian and Caribbean | 2014-12-01 | LC580244.1 | East-Central-South-African | 2017-09-01 |
| MK134712.1 | Asian and Caribbean | 2014-12-03 | LC580245.1 | East-Central-South-African | 2017-09-01 |
| KY703959.1 | Asian and Caribbean | 2014-12-03 | LC580246.1 | East-Central-South-African | 2017-09-01 |
| KY703989.1 | Asian and Caribbean | 2014-12-03 | LC580247.1 | East-Central-South-African | 2017-09-01 |
| KY680374.1 | Asian and Caribbean | 2014-12-06 | MK468627.1 | East-Central-South-African | 2017-09-18 |
| KY703972.1 | Asian and Caribbean | 2014-12-09 | MK120195.1 | East-Central-South-African | 2017-09-27 |
| KY680350.1 | Asian and Caribbean | 2014-12-10 | MK120196.1 | East-Central-South-African | 2017-09-30 |
| KY703983.1 | Asian and Caribbean | 2014-12-11 | LC580248.1 | East-Central-South-African | 2017-10-01 |
| KY703896.1 | Asian and Caribbean | 2014-12-18 | LC580249.1 | East-Central-South-African | 2017-10-01 |
| KY703949.1 | Asian and Caribbean | 2015-01-15 | LC580250.1 | East-Central-South-African | 2017-10-01 |

| Accession  | Lineage             | Date       | Accession  | Lineage                    | Date       |
|------------|---------------------|------------|------------|----------------------------|------------|
| KY704002.1 | Asian and Caribbean | 2015-01-15 | LC580251.1 | East-Central-South-African | 2017-10-01 |
| KY703897.1 | Asian and Caribbean | 2015-01-16 | LC580252.1 | East-Central-South-African | 2017-10-01 |
| KY703999.1 | Asian and Caribbean | 2015-01-19 | LC580253.1 | East-Central-South-African | 2017-11-01 |
| KY704001.1 | Asian and Caribbean | 2015-01-21 | LC580254.1 | East-Central-South-African | 2017-11-01 |
| KY703968.1 | Asian and Caribbean | 2015-01-23 | MK468610.1 | East-Central-South-African | 2017-11-22 |
| KY703901.1 | Asian and Caribbean | 2015-01-26 | LC580255.1 | East-Central-South-African | 2017-12-01 |
| KY703918.1 | Asian and Caribbean | 2015-01-26 | MT380161.1 | East-Central-South-African | 2017-12-01 |
| KY703909.1 | Asian and Caribbean | 2015-01-28 | MT526804.1 | East-Central-South-African | 2017-12-05 |
| KY703919.1 | Asian and Caribbean | 2015-01-29 | MT526800.1 | East-Central-South-African | 2017-12-13 |
| KY703928.1 | Asian and Caribbean | 2015-01-30 | MG925665.1 | East-Central-South-African | 2017-12-15 |
| MT591083.1 | Asian and Caribbean | 2015-02-01 | MT380148.1 | East-Central-South-African | 2018-01-01 |
| MT591084.1 | Asian and Caribbean | 2015-02-01 | MT380149.1 | East-Central-South-African | 2018-01-01 |
| MN462649.1 | Asian and Caribbean | 2015-02-06 | MT380150.1 | East-Central-South-African | 2018-01-01 |
| MN462654.1 | Asian and Caribbean | 2015-02-07 | MT380151.1 | East-Central-South-African | 2018-01-01 |
| KY703938.1 | Asian and Caribbean | 2015-02-18 | MT380152.1 | East-Central-South-African | 2018-01-01 |
| MT150092.1 | Asian and Caribbean | 2015-02-24 | MT380153.1 | East-Central-South-African | 2018-01-01 |
| MT150093.1 | Asian and Caribbean | 2015-03-01 | MT526799.1 | East-Central-South-African | 2018-01-03 |
| MT150094.1 | Asian and Caribbean | 2015-03-01 | MT526798.1 | East-Central-South-African | 2018-01-12 |
| MN462638.1 | Asian and Caribbean | 2015-03-24 | MT526796.1 | East-Central-South-African | 2018-01-15 |
| MN462640.1 | Asian and Caribbean | 2015-04-05 | MT380146.1 | East-Central-South-African | 2018-02-01 |
| MN462658.1 | Asian and Caribbean | 2015-04-08 | MT380147.1 | East-Central-South-African | 2018-02-01 |
| MT038406.1 | Asian and Caribbean | 2015-04-26 | MN428506.1 | East-Central-South-African | 2018-02-01 |
| MT150095.1 | Asian and Caribbean | 2015-04-26 | MK244642.1 | East-Central-South-African | 2018-02-18 |
| MT150100.1 | Asian and Caribbean | 2015-04-27 | MN428504.1 | East-Central-South-African | 2018-02-23 |
| MT038407.1 | Asian and Caribbean | 2015-04-28 | MN428524.1 | East-Central-South-African | 2018-03-06 |
| MT038408.1 | Asian and Caribbean | 2015-05-03 | MN428525.1 | East-Central-South-African | 2018-03-06 |
| MT150096.1 | Asian and Caribbean | 2015-05-04 | MN428526.1 | East-Central-South-African | 2018-03-06 |
| MT150097.1 | Asian and Caribbean | 2015-05-04 | MN428527.1 | East-Central-South-African | 2018-03-06 |
| MT150098.1 | Asian and Caribbean | 2015-05-04 | MN428518.1 | East-Central-South-African | 2018-03-08 |
| MT150099.1 | Asian and Caribbean | 2015-05-04 | MN428522.1 | East-Central-South-African | 2018-03-08 |
| MN462641.1 | Asian and Caribbean | 2015-05-05 | MN428523.1 | East-Central-South-African | 2018-03-08 |
| MT038409.1 | Asian and Caribbean | 2015-05-06 | MN428520.1 | East-Central-South-African | 2018-03-09 |
| LC259091.1 | Asian and Caribbean | 2015-05-07 | MN428509.1 | East-Central-South-African | 2018-03-13 |
| MN462644.1 | Asian and Caribbean | 2015-05-15 | MN428512.1 | East-Central-South-African | 2018-03-13 |
| MN462645.1 | Asian and Caribbean | 2015-05-26 | MN428514.1 | East-Central-South-African | 2018-03-13 |
| MN462646.1 | Asian and Caribbean | 2015-05-27 | MN428519.1 | East-Central-South-African | 2018-03-16 |
| MN462647.1 | Asian and Caribbean | 2015-05-28 | MN428521.1 | East-Central-South-African | 2018-03-16 |
| MN462648.1 | Asian and Caribbean | 2015-05-28 | MN428517.1 | East-Central-South-African | 2018-03-17 |
| MN462650.1 | Asian and Caribbean | 2015-06-16 | MN428515.1 | East-Central-South-African | 2018-03-20 |
| MN462651.1 | Asian and Caribbean | 2015-06-24 | MN428516.1 | East-Central-South-African | 2018-03-23 |
| MN462652.1 | Asian and Caribbean | 2015-06-30 | MK244644.1 | East-Central-South-African | 2018-03-26 |
| MN462653.1 | Asian and Caribbean | 2015-06-30 | MK244647.1 | East-Central-South-African | 2018-03-27 |
| MN462655.1 | Asian and Caribbean | 2015-07-14 | MK244643.1 | East-Central-South-African | 2018-03-28 |
| KY680389.1 | Asian and Caribbean | 2015-07-14 | MK244645.1 | East-Central-South-African | 2018-03-28 |
| KY703907.1 | Asian and Caribbean | 2015-07-15 | MK244646.1 | East-Central-South-African | 2018-03-28 |
| MN462656.1 | Asian and Caribbean | 2015-07-23 | MT380154.1 | East-Central-South-African | 2018-04-01 |
| KY680366.1 | Asian and Caribbean | 2015-07-24 | MT380155.1 | East-Central-South-African | 2018-04-01 |

| Accession  | Lineage             | Date       | Accession  | Lineage                    | Date       |
|------------|---------------------|------------|------------|----------------------------|------------|
| MN462657.1 | Asian and Caribbean | 2015-07-29 | MT380156.1 | East-Central-South-African | 2018-04-01 |
| KY703915.1 | Asian and Caribbean | 2015-08-03 | MT380160.1 | East-Central-South-African | 2018-04-01 |
| KY703977.1 | Asian and Caribbean | 2015-08-03 | MT380162.1 | East-Central-South-African | 2018-04-01 |
| MN462639.1 | Asian and Caribbean | 2015-08-04 | MK244649.1 | East-Central-South-African | 2018-04-03 |
| KY703916.1 | Asian and Caribbean | 2015-08-04 | MK244650.1 | East-Central-South-African | 2018-04-03 |
| KY703942.1 | Asian and Caribbean | 2015-08-04 | MK244648.1 | East-Central-South-African | 2018-04-04 |
| KY703889.1 | Asian and Caribbean | 2015-08-05 | MK244651.1 | East-Central-South-African | 2018-04-05 |
| KY703951.1 | Asian and Caribbean | 2015-08-05 | MK244652.1 | East-Central-South-African | 2018-04-05 |
| KY703992.1 | Asian and Caribbean | 2015-08-05 | MK244653.1 | East-Central-South-African | 2018-04-06 |
| KY703961.1 | Asian and Caribbean | 2015-08-06 | MK244654.1 | East-Central-South-African | 2018-04-06 |
| KY703998.1 | Asian and Caribbean | 2015-08-06 | MK244655.1 | East-Central-South-African | 2018-04-06 |
| KY703913.1 | Asian and Caribbean | 2015-08-13 | MK244656.1 | East-Central-South-African | 2018-04-06 |
| KY703924.1 | Asian and Caribbean | 2015-08-13 | MN428511.1 | East-Central-South-African | 2018-04-18 |
| KY703995.1 | Asian and Caribbean | 2015-08-13 | MN428510.1 | East-Central-South-African | 2018-04-25 |
| MN462660.1 | Asian and Caribbean | 2015-08-14 | MN428513.1 | East-Central-South-African | 2018-04-26 |
| MN462661.1 | Asian and Caribbean | 2015-08-14 | MN428508.1 | East-Central-South-African | 2018-04-27 |
| KY703888.1 | Asian and Caribbean | 2015-08-15 | MT380157.1 | East-Central-South-African | 2018-05-01 |
| KY703914.1 | Asian and Caribbean | 2015-08-15 | MT380158.1 | East-Central-South-African | 2018-05-01 |
| KY703948.1 | Asian and Caribbean | 2015-08-18 | MT380159.1 | East-Central-South-African | 2018-05-01 |
| KY703932.1 | Asian and Caribbean | 2015-08-19 | MT526797.1 | East-Central-South-African | 2018-05-15 |
| KY703926.1 | Asian and Caribbean | 2015-08-20 | MN428505.1 | East-Central-South-African | 2018-05-21 |
| KY703898.1 | Asian and Caribbean | 2015-08-25 | MN974214.1 | East-Central-South-African | 2018-06-20 |
| MN462662.1 | Asian and Caribbean | 2015-08-27 | MN974215.1 | East-Central-South-African | 2018-06-23 |
| KY703893.1 | Asian and Caribbean | 2015-09-02 | MT038399.1 | East-Central-South-African | 2018-06-25 |
| KY703965.1 | Asian and Caribbean | 2015-09-03 | MT038401.1 | East-Central-South-African | 2018-06-25 |
| KY703974.1 | Asian and Caribbean | 2015-09-03 | MK468801.1 | East-Central-South-African | 2018-06-27 |
| KY703902.1 | Asian and Caribbean | 2015-09-05 | MT666073.1 | East-Central-South-African | 2018-06-28 |
| KY703903.1 | Asian and Caribbean | 2015-09-05 | MT038400.1 | East-Central-South-African | 2018-06-29 |
| KY703957.1 | Asian and Caribbean | 2015-09-05 | MN974216.1 | East-Central-South-African | 2018-06-30 |
| KY703976.1 | Asian and Caribbean | 2015-09-05 | MN974217.1 | East-Central-South-African | 2018-07-02 |
| KY703922.1 | Asian and Caribbean | 2015-09-06 | MN974218.1 | East-Central-South-African | 2018-07-02 |
| KY703925.1 | Asian and Caribbean | 2015-09-06 | MT038402.1 | East-Central-South-African | 2018-07-03 |
| KY703980.1 | Asian and Caribbean | 2015-09-06 | MN428507.1 | East-Central-South-African | 2018-07-05 |
| KY703963.1 | Asian and Caribbean | 2015-09-07 | MT038403.1 | East-Central-South-African | 2018-07-10 |
| KY703906.1 | Asian and Caribbean | 2015-09-08 | MN974219.1 | East-Central-South-African | 2018-07-13 |
| KY703891.1 | Asian and Caribbean | 2015-09-17 | MN974220.1 | East-Central-South-African | 2018-07-19 |
| KY703905.1 | Asian and Caribbean | 2015-09-17 | MN974221.1 | East-Central-South-African | 2018-07-19 |
| KY703923.1 | Asian and Caribbean | 2015-09-19 | MN974222.1 | East-Central-South-African | 2018-07-21 |
| KY703931.1 | Asian and Caribbean | 2015-09-19 | MN974223.1 | East-Central-South-African | 2018-07-21 |
| KY703975.1 | Asian and Caribbean | 2015-09-22 | MK040571.1 | East-Central-South-African | 2018-08-21 |
| KY703979.1 | Asian and Caribbean | 2015-09-22 | MK040570.1 | East-Central-South-African | 2018-08-24 |
| KY703890.1 | Asian and Caribbean | 2015-09-23 | MT666071.1 | East-Central-South-African | 2018-09-17 |
| KY703962.1 | Asian and Caribbean | 2015-10-01 | MK156053.1 | East-Central-South-African | 2018-09-21 |
| KY703945.1 | Asian and Caribbean | 2015-10-02 | MK156054.1 | East-Central-South-African | 2018-09-21 |
| KY703944.1 | Asian and Caribbean | 2015-10-03 | MK156055.1 | East-Central-South-African | 2018-09-21 |
| KY703953.1 | Asian and Caribbean | 2015-10-06 | MK156056.1 | East-Central-South-African | 2018-09-21 |
| KY703936.1 | Asian and Caribbean | 2015-10-07 | MK156058.1 | East-Central-South-African | 2018-09-21 |



[illegible]

| Accession  | Lineage                    | Date       | Accession  | Lineage                    | Date       |
|------------|----------------------------|------------|------------|----------------------------|------------|
| KY703917.1 | Asian and Caribbean        | 2016-01-08 | MW161405.1 | East-Central-South-African | 2018-10-01 |
| MT038393.1 | Asian and Caribbean        | 2016-01-20 | MW161406.1 | East-Central-South-African | 2018-10-01 |
| MT038397.1 | Asian and Caribbean        | 2016-01-21 | MW161407.1 | East-Central-South-African | 2018-10-01 |
| MT038395.1 | Asian and Caribbean        | 2016-02-16 | MW161408.1 | East-Central-South-African | 2018-10-01 |
| MT038394.1 | Asian and Caribbean        | 2016-02-19 | MW161409.1 | East-Central-South-African | 2018-10-01 |
| MT038396.1 | Asian and Caribbean        | 2016-02-22 | MW161410.1 | East-Central-South-African | 2018-10-01 |
| MT038398.1 | Asian and Caribbean        | 2016-03-21 | MW161411.1 | East-Central-South-African | 2018-10-01 |
| OK655884.1 | Asian and Caribbean        | 2016-11-21 | MW161412.1 | East-Central-South-African | 2018-10-01 |
| OK655883.1 | Asian and Caribbean        | 2016-11-24 | MW161413.1 | East-Central-South-African | 2018-10-01 |
| MT591104.1 | Asian and Caribbean        | 2017-01-01 | MW161414.1 | East-Central-South-African | 2018-10-01 |
| MT591090.1 | Asian and Caribbean        | 2017-02-01 | MW161415.1 | East-Central-South-African | 2018-10-01 |
| MT591091.1 | Asian and Caribbean        | 2017-03-01 | MW161416.1 | East-Central-South-African | 2018-10-01 |
| MT591105.1 | Asian and Caribbean        | 2018-03-01 | MW161417.1 | East-Central-South-African | 2018-10-01 |
| MT591106.1 | Asian and Caribbean        | 2018-05-01 | MW161418.1 | East-Central-South-African | 2018-10-01 |
| MT591107.1 | Asian and Caribbean        | 2018-07-01 | MW161419.1 | East-Central-South-African | 2018-10-01 |
| HM045809.1 | East-Central-South-African | 1905-05-13 | MW161420.1 | East-Central-South-African | 2018-10-01 |
| HM045795.1 | East-Central-South-African | 1905-05-29 | MW161421.1 | East-Central-South-African | 2018-10-01 |
| HM045812.1 | East-Central-South-African | 1905-06-04 | MW161422.1 | East-Central-South-African | 2018-10-01 |
| KY575574.1 | East-Central-South-African | 1905-06-17 | MW161423.1 | East-Central-South-African | 2018-10-01 |
| KP702297.1 | East-Central-South-African | 1905-06-27 | MW161424.1 | East-Central-South-African | 2018-10-01 |
| KF283986.1 | East-Central-South-African | 1905-06-27 | MW161425.1 | East-Central-South-African | 2018-10-01 |
| KF283987.1 | East-Central-South-African | 1905-06-27 | MW161426.1 | East-Central-South-African | 2018-10-01 |
| MK028838.1 | East-Central-South-African | 1905-06-28 | MW161427.1 | East-Central-South-African | 2018-10-01 |
| KY575567.1 | East-Central-South-African | 1905-06-28 | MW161428.1 | East-Central-South-African | 2018-10-01 |
| KY575568.1 | East-Central-South-African | 1905-06-28 | MW161429.1 | East-Central-South-African | 2018-10-01 |
| KY575571.1 | East-Central-South-African | 1905-06-28 | MW161430.1 | East-Central-South-African | 2018-10-01 |
| KX262996.1 | East-Central-South-African | 1905-06-28 | MW161431.1 | East-Central-South-African | 2018-10-01 |
| KP003807.1 | East-Central-South-African | 1905-06-28 | MW161432.1 | East-Central-South-African | 2018-10-01 |
| KP003808.1 | East-Central-South-African | 1905-06-28 | MW161433.1 | East-Central-South-African | 2018-10-01 |
| KP003809.1 | East-Central-South-African | 1905-06-28 | MW161434.1 | East-Central-South-African | 2018-10-01 |
| KJ941050.1 | East-Central-South-African | 1905-06-28 | MW161435.1 | East-Central-South-African | 2018-10-01 |
| HM045794.1 | East-Central-South-African | 1905-06-28 | MW161436.1 | East-Central-South-African | 2018-10-01 |
| GU189061.1 | East-Central-South-African | 1905-06-28 | MW161437.1 | East-Central-South-African | 2018-10-01 |
| FJ807896.1 | East-Central-South-African | 1905-06-28 | MW161438.1 | East-Central-South-African | 2018-10-01 |
| FJ959103.1 | East-Central-South-African | 1905-06-28 | MW161439.1 | East-Central-South-African | 2018-10-01 |
| EF210157.2 | East-Central-South-African | 1905-06-28 | MW161440.1 | East-Central-South-African | 2018-10-01 |
| KX262989.1 | East-Central-South-African | 1905-06-29 | MW161441.1 | East-Central-South-African | 2018-10-01 |
| KX262993.1 | East-Central-South-African | 1905-06-29 | MW161442.1 | East-Central-South-African | 2018-10-01 |
| KP003810.1 | East-Central-South-African | 1905-06-29 | MW161443.1 | East-Central-South-African | 2018-10-01 |
| KP003811.1 | East-Central-South-African | 1905-06-29 | MW161444.1 | East-Central-South-African | 2018-10-01 |
| KP003812.1 | East-Central-South-African | 1905-06-29 | MW161445.1 | East-Central-South-African | 2018-10-01 |
| HM045799.1 | East-Central-South-African | 1905-06-29 | MW161446.1 | East-Central-South-African | 2018-10-01 |
| HM045801.1 | East-Central-South-African | 1905-06-29 | MW161447.1 | East-Central-South-African | 2018-10-01 |
| MF773568.1 | East-Central-South-African | 1905-06-30 | MW161448.1 | East-Central-South-African | 2018-10-01 |
| KY575570.1 | East-Central-South-African | 1905-06-30 | MW161449.1 | East-Central-South-African | 2018-10-01 |
| JN558835.1 | East-Central-South-African | 1905-06-30 | MW161450.1 | East-Central-South-African | 2018-10-01 |
| GU199350.1 | East-Central-South-African | 1905-06-30 | MW161451.1 | East-Central-South-African | 2018-10-01 |

| Accession  | Lineage                    | Date       | Accession  | Lineage                    | Date       |
|------------|----------------------------|------------|------------|----------------------------|------------|
| GU199351.1 | East-Central-South-African | 1905-06-30 | MW161452.1 | East-Central-South-African | 2018-10-01 |
| GU199352.1 | East-Central-South-African | 1905-06-30 | MW161453.1 | East-Central-South-African | 2018-10-01 |
| GU199353.1 | East-Central-South-African | 1905-06-30 | MW161454.1 | East-Central-South-African | 2018-10-01 |
| FJ807898.1 | East-Central-South-African | 1905-06-30 | MW161455.1 | East-Central-South-African | 2018-10-01 |
| FJ807899.1 | East-Central-South-African | 1905-06-30 | MW161456.1 | East-Central-South-African | 2018-10-01 |
| FN295485.3 | East-Central-South-African | 1905-06-30 | MW161457.1 | East-Central-South-African | 2018-10-01 |
| FN295487.2 | East-Central-South-African | 1905-06-30 | MW161458.1 | East-Central-South-African | 2018-10-01 |
| KX262997.1 | East-Central-South-African | 1905-07-01 | MW161459.1 | East-Central-South-African | 2018-10-01 |
| JN558834.1 | East-Central-South-African | 1905-07-01 | MW161460.1 | East-Central-South-African | 2018-10-01 |
| JN558836.1 | East-Central-South-African | 1905-07-01 | MK163628.1 | East-Central-South-African | 2018-10-02 |
| LC580270.1 | East-Central-South-African | 1905-07-02 | MK848202.1 | East-Central-South-African | 2018-11-21 |
| MH124570.1 | East-Central-South-African | 1905-07-02 | MN974211.1 | East-Central-South-African | 2018-12-12 |
| MH124571.1 | East-Central-South-African | 1905-07-02 | MT636907.1 | East-Central-South-African | 2019-01-07 |
| MH124572.1 | East-Central-South-African | 1905-07-02 | MT636908.1 | East-Central-South-African | 2019-01-07 |
| MH124573.1 | East-Central-South-African | 1905-07-02 | MT933029.1 | East-Central-South-African | 2019-01-21 |
| MH124574.1 | East-Central-South-African | 1905-07-02 | MT636909.1 | East-Central-South-African | 2019-01-21 |
| MH124575.1 | East-Central-South-African | 1905-07-02 | MT636910.1 | East-Central-South-African | 2019-01-21 |
| MH124576.1 | East-Central-South-African | 1905-07-02 | MT636911.1 | East-Central-South-African | 2019-01-21 |
| MH124577.1 | East-Central-South-African | 1905-07-02 | MT933030.1 | East-Central-South-African | 2019-01-28 |
| MH124578.1 | East-Central-South-African | 1905-07-02 | MT636912.1 | East-Central-South-African | 2019-02-01 |
| MH124579.1 | East-Central-South-African | 1905-07-02 | MN075149.1 | East-Central-South-African | 2019-02-01 |
| MG664850.1 | East-Central-South-African | 1905-07-02 | MN075150.1 | East-Central-South-African | 2019-02-01 |
| KF590564.1 | East-Central-South-African | 1905-07-02 | MT933032.1 | East-Central-South-African | 2019-02-05 |
| KF590565.1 | East-Central-South-African | 1905-07-02 | MT636913.1 | East-Central-South-African | 2019-02-06 |
| KF590566.1 | East-Central-South-African | 1905-07-02 | MN974208.1 | East-Central-South-African | 2019-02-12 |
| KC862329.1 | East-Central-South-African | 1905-07-02 | MT933031.1 | East-Central-South-African | 2019-02-18 |
| JX088705.1 | East-Central-South-African | 1905-07-02 | MK935344.1 | East-Central-South-African | 2019-03-05 |
| MF773567.1 | East-Central-South-African | 1905-07-03 | MT933033.1 | East-Central-South-African | 2019-03-08 |
| KP003813.2 | East-Central-South-African | 1905-07-03 | MN974207.1 | East-Central-South-African | 2019-03-12 |
| MF773569.1 | East-Central-South-African | 1905-07-05 | MT933034.1 | East-Central-South-African | 2019-03-15 |
| KX009167.1 | East-Central-South-African | 1905-07-05 | MK935343.1 | East-Central-South-African | 2019-03-20 |
| KX009168.1 | East-Central-South-African | 1905-07-05 | MW260512.1 | East-Central-South-African | 2019-03-23 |
| KX009169.1 | East-Central-South-African | 1905-07-05 | MW260513.1 | East-Central-South-African | 2019-03-23 |
| KX009170.1 | East-Central-South-African | 1905-07-05 | MW260515.1 | East-Central-South-African | 2019-03-27 |
| KX009171.1 | East-Central-South-African | 1905-07-05 | MW260514.1 | East-Central-South-African | 2019-03-28 |
| MK286895.1 | East-Central-South-African | 1905-07-06 | MW260516.1 | East-Central-South-African | 2019-03-28 |
| MK370030.1 | East-Central-South-African | 1905-07-07 | MW260517.1 | East-Central-South-African | 2019-03-29 |
| MK370031.1 | East-Central-South-African | 1905-07-07 | LC664141.1 | East-Central-South-African | 2019-03-30 |
| MG649984.1 | East-Central-South-African | 2015       | LC664143.1 | East-Central-South-African | 2019-03-30 |
| MG649985.1 | East-Central-South-African | 2015       | MW260518.1 | East-Central-South-African | 2019-03-30 |
| MW574902.1 | East-Central-South-African | 1905-07-08 | MW260519.1 | East-Central-South-African | 2019-03-30 |
| MW321606.1 | East-Central-South-African | 1905-07-08 | LC664142.1 | East-Central-South-African | 2019-03-31 |
| MK370032.1 | East-Central-South-African | 1905-07-08 | LC664145.1 | East-Central-South-African | 2019-04-01 |
| MK370033.1 | East-Central-South-African | 1905-07-08 | LC664149.1 | East-Central-South-African | 2019-04-01 |
| MH124580.1 | East-Central-South-African | 1905-07-08 | LC664146.1 | East-Central-South-African | 2019-04-03 |
| MH124581.1 | East-Central-South-African | 1905-07-08 | LC664148.1 | East-Central-South-African | 2019-04-04 |
| MH124582.1 | East-Central-South-African | 1905-07-08 | LC664147.1 | East-Central-South-African | 2019-04-07 |

| Accession  | Lineage                    | Date       | Accession  | Lineage                    | Date       |
|------------|----------------------------|------------|------------|----------------------------|------------|
| MH124583.1 | East-Central-South-African | 1905-07-08 | LC664150.1 | East-Central-South-African | 2019-04-10 |
| MK473630.1 | East-Central-South-African | 1905-07-08 | LC664151.1 | East-Central-South-African | 2019-04-14 |
| MK473634.1 | East-Central-South-African | 1905-07-08 | MT495605.1 | East-Central-South-African | 2019-04-14 |
| LC331252.1 | East-Central-South-African | 1905-07-08 | MT933035.1 | East-Central-South-African | 2019-04-17 |
| MF774613.1 | East-Central-South-African | 1905-07-08 | MT933036.1 | East-Central-South-African | 2019-04-17 |
| MF774614.1 | East-Central-South-African | 1905-07-08 | MT933037.1 | East-Central-South-African | 2019-04-18 |
| MF774615.1 | East-Central-South-African | 1905-07-08 | MT933038.1 | East-Central-South-African | 2019-04-22 |
| MF774616.1 | East-Central-South-African | 1905-07-08 | LC664144.1 | East-Central-South-African | 2019-04-24 |
| MF774617.1 | East-Central-South-African | 1905-07-08 | LC664153.1 | East-Central-South-African | 2019-05-01 |
| MF774618.1 | East-Central-South-African | 1905-07-08 | LC664154.1 | East-Central-South-African | 2019-05-01 |
| MF774619.1 | East-Central-South-African | 1905-07-08 | MT933039.1 | East-Central-South-African | 2019-05-06 |
| KY751908.1 | East-Central-South-African | 1905-07-08 | MT933040.1 | East-Central-South-African | 2019-05-06 |
| MK286893.1 | East-Central-South-African | 1905-07-09 | MN402883.1 | East-Central-South-African | 2019-05-07 |
| MK286894.1 | East-Central-South-African | 1905-07-09 | MT933041.1 | East-Central-South-African | 2019-05-08 |
| MK286899.1 | East-Central-South-African | 1905-07-09 | MN402885.1 | East-Central-South-African | 2019-05-08 |
| MH507158.1 | East-Central-South-African | 1905-07-09 | MT933042.1 | East-Central-South-African | 2019-05-11 |
| MF740874.1 | East-Central-South-African | 1905-07-09 | LC664152.1 | East-Central-South-African | 2019-05-19 |
| MF773566.1 | East-Central-South-African | 1905-07-09 | MT933051.1 | East-Central-South-African | 2019-05-28 |
| MG049915.1 | East-Central-South-African | 1905-07-09 | MW042255.1 | East-Central-South-African | 2019-06-01 |
| MK286897.1 | East-Central-South-African | 1905-07-10 | MT933043.1 | East-Central-South-African | 2019-06-07 |
| MK286898.1 | East-Central-South-African | 1905-07-10 | MT933044.1 | East-Central-South-African | 2019-06-13 |
| MN630017.1 | East-Central-South-African | 1905-07-11 | LC664155.1 | East-Central-South-African | 2019-06-18 |
| MK690206.1 | East-Central-South-African | 1905-07-11 | MT933045.1 | East-Central-South-African | 2019-06-19 |
| HM045811.1 | East-Central-South-African | 1953-02-22 | MN402884.1 | East-Central-South-African | 2019-06-28 |
| HM045792.1 | East-Central-South-African | 1956-04-01 | MT933046.1 | East-Central-South-African | 2019-07-01 |
| HM045822.1 | East-Central-South-African | 1978-10-01 | MT933047.1 | East-Central-South-African | 2019-07-02 |
| KY038947.2 | East-Central-South-African | 1983-12-01 | MN402886.1 | East-Central-South-African | 2019-07-02 |
| FR717336.1 | East-Central-South-African | 2005-12-26 | MT933049.1 | East-Central-South-African | 2019-07-07 |
| FR717337.1 | East-Central-South-African | 2005-12-26 | MN974212.1 | East-Central-South-African | 2019-07-08 |
| EU564334.1 | East-Central-South-African | 2006-02-14 | MN974205.1 | East-Central-South-African | 2019-07-24 |
| FJ000067.1 | East-Central-South-African | 2006-08-01 | MN402889.1 | East-Central-South-African | 2019-07-25 |
| FJ000068.1 | East-Central-South-African | 2006-08-01 | MN402890.1 | East-Central-South-African | 2019-07-26 |
| FJ000062.1 | East-Central-South-African | 2006-09-01 | MN402891.1 | East-Central-South-African | 2019-07-30 |
| FJ000064.1 | East-Central-South-African | 2006-09-01 | MT933048.1 | East-Central-South-African | 2019-07-31 |
| FJ000065.1 | East-Central-South-African | 2006-09-01 | MN402887.1 | East-Central-South-African | 2019-08-01 |
| FJ000066.1 | East-Central-South-African | 2006-09-01 | MN402888.1 | East-Central-South-African | 2019-08-01 |
| JF274082.1 | East-Central-South-African | 2006-09-27 | LC664156.1 | East-Central-South-African | 2019-08-02 |
| FJ000063.1 | East-Central-South-African | 2006-10-01 | MN402892.1 | East-Central-South-African | 2019-08-02 |
| GQ428210.1 | East-Central-South-African | 2006-10-07 | MN756625.1 | East-Central-South-African | 2019-08-08 |
| GQ428211.1 | East-Central-South-African | 2006-10-07 | MT495606.1 | East-Central-South-African | 2019-08-12 |
| EU564335.1 | East-Central-South-African | 2006-10-31 | MT933050.1 | East-Central-South-African | 2019-08-14 |
| MK086029.1 | East-Central-South-African | 2006-11-14 | MN974204.1 | East-Central-South-African | 2019-08-15 |
| FJ445428.2 | East-Central-South-African | 2007-05-01 | MN974210.1 | East-Central-South-African | 2019-08-26 |
| FJ000069.1 | East-Central-South-African | 2007-06-01 | MT495607.1 | East-Central-South-African | 2019-08-28 |
| EU372006.1 | East-Central-South-African | 2007-06-11 | MN974206.1 | East-Central-South-African | 2019-08-30 |
| FJ445427.2 | East-Central-South-African | 2007-07-01 | MN974224.1 | East-Central-South-African | 2019-09-06 |
| GQ428212.1 | East-Central-South-African | 2007-07-12 | MN974203.1 | East-Central-South-African | 2019-09-11 |

| Accession  | Lineage                    | Date       | Accession  | Lineage                    | Date       |
|------------|----------------------------|------------|------------|----------------------------|------------|
| GQ428213.1 | East-Central-South-African | 2007-07-13 | MW110472.1 | East-Central-South-African | 2019-09-28 |
| MK120201.1 | East-Central-South-African | 2007-08-20 | LC580256.1 | East-Central-South-African | 2019-10-01 |
| MK120202.1 | East-Central-South-African | 2007-08-25 | LC580257.1 | East-Central-South-African | 2019-10-01 |
| FJ445510.2 | East-Central-South-African | 2008-01-01 | LC580258.1 | East-Central-South-African | 2019-10-01 |
| FJ445511.2 | East-Central-South-African | 2008-01-01 | LC580259.1 | East-Central-South-African | 2019-10-01 |
| GU013528.2 | East-Central-South-African | 2008-03-01 | LC580260.1 | East-Central-South-African | 2019-10-01 |
| GU013529.2 | East-Central-South-African | 2008-03-01 | LC580261.1 | East-Central-South-African | 2019-10-01 |
| FJ513628.1 | East-Central-South-African | 2008-03-01 | LC580262.1 | East-Central-South-African | 2019-10-01 |
| FJ513629.1 | East-Central-South-African | 2008-03-01 | LC580263.1 | East-Central-South-African | 2019-10-01 |
| FJ513632.1 | East-Central-South-African | 2008-03-01 | LC580264.1 | East-Central-South-African | 2019-10-01 |
| FJ513635.1 | East-Central-South-African | 2008-03-01 | LC580265.1 | East-Central-South-African | 2019-10-01 |
| FJ513637.1 | East-Central-South-African | 2008-03-01 | LC580266.1 | East-Central-South-African | 2019-10-01 |
| GU013530.2 | East-Central-South-African | 2008-04-01 | LC580267.1 | East-Central-South-African | 2019-10-01 |
| FJ513645.1 | East-Central-South-African | 2008-04-01 | LC580268.1 | East-Central-South-African | 2019-10-01 |
| FJ513654.1 | East-Central-South-African | 2008-04-01 | LC580269.1 | East-Central-South-African | 2019-10-01 |
| FJ513657.1 | East-Central-South-African | 2008-04-01 | MW291576.1 | East-Central-South-African | 2019-10-04 |
| FJ513673.1 | East-Central-South-African | 2008-04-01 | MW110473.1 | East-Central-South-African | 2019-10-06 |
| FJ513675.1 | East-Central-South-African | 2008-04-01 | MW110474.1 | East-Central-South-African | 2019-10-06 |
| FJ513679.1 | East-Central-South-African | 2008-04-01 | MN974209.1 | East-Central-South-African | 2019-10-07 |
| FJ445426.2 | East-Central-South-African | 2008-04-01 | MN974213.1 | East-Central-South-African | 2019-10-07 |
| FJ445484.2 | East-Central-South-African | 2008-05-01 | MW110475.1 | East-Central-South-African | 2019-10-08 |
| GQ428215.1 | East-Central-South-African | 2008-05-29 | MW110476.1 | East-Central-South-African | 2019-10-12 |
| GQ428214.1 | East-Central-South-African | 2008-06-29 | MW110477.1 | East-Central-South-African | 2019-10-12 |
| FJ445430.2 | East-Central-South-African | 2008-07-01 | MT668625.1 | East-Central-South-African | 2019-11-04 |
| FJ445431.2 | East-Central-South-African | 2008-07-01 | MT495608.1 | East-Central-South-African | 2019-11-06 |
| FJ445432.2 | East-Central-South-African | 2008-07-01 | MT023791.1 | East-Central-South-African | 2019-12-15 |
| FJ445463.2 | East-Central-South-African | 2008-07-01 | MT640255.1 | East-Central-South-African | 2020-01-17 |
| FJ445433.2 | East-Central-South-African | 2008-08-01 | MT640256.1 | East-Central-South-African | 2020-02-05 |
| FJ445443.2 | East-Central-South-African | 2008-08-01 | LC664157.1 | East-Central-South-African | 2020-06-29 |
| FJ445445.2 | East-Central-South-African | 2008-08-01 | OL705486.1 | East-Central-South-African | 2020-07-15 |
| FJ445502.2 | East-Central-South-African | 2008-08-01 | LC664158.1 | East-Central-South-African | 2020-07-21 |
| FR687340.1 | East-Central-South-African | 2008-08-21 | OL741630.1 | East-Central-South-African | 2020-07-23 |
| GU301780.1 | East-Central-South-African | 2008-10-21 | LC664159.1 | East-Central-South-African | 2020-08-04 |
| FR687341.1 | East-Central-South-African | 2008-11-05 | LC664160.1 | East-Central-South-African | 2020-08-19 |
| FR687342.1 | East-Central-South-African | 2008-11-10 | LC664161.1 | East-Central-South-African | 2020-08-20 |
| KT324224.1 | East-Central-South-African | 2008-12-01 | LC664162.1 | East-Central-South-African | 2020-08-26 |
| FR687343.1 | East-Central-South-African | 2008-12-12 | LC664163.1 | East-Central-South-African | 2020-08-28 |
| KT324225.1 | East-Central-South-African | 2009-01-01 | OL898663.1 | East-Central-South-African | 2020-09-05 |
| KT324226.1 | East-Central-South-African | 2009-01-01 | LC664164.1 | East-Central-South-African | 2020-09-08 |
| LC259093.1 | East-Central-South-African | 2009-01-06 | LC664165.1 | East-Central-South-African | 2020-09-13 |
| FR687344.1 | East-Central-South-African | 2009-01-12 | OL849990.1 | East-Central-South-African | 2020-09-22 |
| KT324228.1 | East-Central-South-African | 2009-02-01 | LC664166.1 | East-Central-South-African | 2020-09-25 |
| FR687345.1 | East-Central-South-African | 2009-02-05 | OL849991.1 | East-Central-South-African | 2020-09-28 |
| FR687347.1 | East-Central-South-African | 2009-02-12 | OL893105.1 | East-Central-South-African | 2020-10-06 |
| FR687346.1 | East-Central-South-African | 2009-02-16 | OL893106.1 | East-Central-South-African | 2020-10-09 |
| KT324227.1 | East-Central-South-African | 2009-03-01 | OL893107.1 | East-Central-South-African | 2020-10-14 |
| FR687348.1 | East-Central-South-African | 2009-04-03 | OL979157.1 | East-Central-South-African | 2020-11-02 |

| Accession  | Lineage                    | Date       | Accession  | Lineage                    | Date       |
|------------|----------------------------|------------|------------|----------------------------|------------|
| GQ905863.1 | East-Central-South-African | 2009-05-25 | OL979156.1 | East-Central-South-African | 2020-11-16 |
| KF151174.1 | East-Central-South-African | 2009-07-13 | OL979155.1 | East-Central-South-African | 2020-11-18 |
| GU301781.1 | East-Central-South-African | 2009-07-27 | OL898714.1 | East-Central-South-African | 2020-11-20 |
| GU301779.1 | East-Central-South-African | 2009-09-04 | OL979154.1 | East-Central-South-African | 2020-12-07 |
| MH647212.1 | East-Central-South-African | 2009-11-01 | OL898669.1 | East-Central-South-African | 2020-12-17 |
| MH647210.1 | East-Central-South-African | 2009-12-01 | OL979153.1 | East-Central-South-African | 2020-12-24 |
| MH647211.1 | East-Central-South-African | 2009-12-01 | OL999091.1 | East-Central-South-African | 2020-12-25 |
| KF151175.1 | East-Central-South-African | 2009-12-11 | OL898675.1 | East-Central-South-African | 2020-12-26 |
| MH636708.1 | East-Central-South-African | 2010-01-01 | OL898668.1 | East-Central-South-African | 2021-01-06 |
| MH647213.1 | East-Central-South-African | 2010-01-01 | OL898682.1 | East-Central-South-African | 2021-01-07 |
| MH647214.1 | East-Central-South-African | 2010-01-01 | OL898707.1 | East-Central-South-African | 2021-01-07 |
| MH647216.1 | East-Central-South-African | 2010-01-01 | OL898689.1 | East-Central-South-African | 2021-01-15 |
| MH647215.1 | East-Central-South-African | 2010-02-01 | OL898690.1 | East-Central-South-African | 2021-01-16 |
| JQ065885.1 | East-Central-South-African | 2010-10-01 | OL898674.1 | East-Central-South-African | 2021-01-23 |
| JQ065886.1 | East-Central-South-African | 2010-10-01 | OL898696.1 | East-Central-South-African | 2021-01-28 |
| JQ065887.1 | East-Central-South-African | 2010-10-01 | OL898700.1 | East-Central-South-African | 2021-01-28 |
| JQ065888.1 | East-Central-South-African | 2010-10-01 | OL898704.1 | East-Central-South-African | 2021-01-28 |
| JQ065889.1 | East-Central-South-African | 2010-10-01 | OL898664.1 | East-Central-South-African | 2021-01-31 |
| JQ065890.1 | East-Central-South-African | 2010-10-01 | OL898683.1 | East-Central-South-African | 2021-01-31 |
| JQ065891.1 | East-Central-South-African | 2010-10-01 | OL898667.1 | East-Central-South-African | 2021-02-01 |
| JQ065892.1 | East-Central-South-African | 2010-10-01 | OL898670.1 | East-Central-South-African | 2021-02-02 |
| HQ846356.1 | East-Central-South-African | 2010-10-01 | OL898676.1 | East-Central-South-African | 2021-02-02 |
| HQ846357.1 | East-Central-South-African | 2010-10-01 | OL898710.1 | East-Central-South-African | 2021-02-02 |
| HQ846358.1 | East-Central-South-African | 2010-10-01 | OL898711.1 | East-Central-South-African | 2021-02-08 |
| HQ846359.1 | East-Central-South-African | 2010-10-01 | OL898697.1 | East-Central-South-African | 2021-02-09 |
| JQ861259.1 | East-Central-South-African | 2011-05-26 | OL898699.1 | East-Central-South-African | 2021-02-09 |
| JQ861260.1 | East-Central-South-African | 2011-05-28 | OL898706.1 | East-Central-South-African | 2021-02-09 |
| JQ861253.1 | East-Central-South-African | 2011-08-16 | OL999092.1 | East-Central-South-African | 2021-02-12 |
| JQ861254.1 | East-Central-South-African | 2011-08-16 | OL898677.1 | East-Central-South-African | 2021-02-13 |
| JQ861255.1 | East-Central-South-African | 2011-08-16 | OL898693.1 | East-Central-South-African | 2021-02-13 |
| JQ861256.1 | East-Central-South-African | 2011-08-16 | OL898705.1 | East-Central-South-African | 2021-02-13 |
| JQ861257.1 | East-Central-South-African | 2011-08-16 | OL898684.1 | East-Central-South-African | 2021-02-14 |
| JQ861258.1 | East-Central-South-African | 2011-08-16 | OL898671.1 | East-Central-South-African | 2021-02-16 |
| KJ679577.1 | East-Central-South-African | 2011-09-12 | OL898712.1 | East-Central-South-African | 2021-02-18 |
| MH647180.1 | East-Central-South-African | 2011-10-01 | OL898681.1 | East-Central-South-African | 2021-02-20 |
| MH647181.1 | East-Central-South-African | 2011-11-01 | OL898691.1 | East-Central-South-African | 2021-02-21 |
| KU365370.1 | East-Central-South-African | 2011-11-01 | OL898665.1 | East-Central-South-African | 2021-02-22 |
| KU365371.1 | East-Central-South-African | 2011-11-01 | OL898685.1 | East-Central-South-African | 2021-02-22 |
| KJ679578.1 | East-Central-South-African | 2011-12-21 | OL999093.1 | East-Central-South-African | 2021-02-24 |
| MH647182.1 | East-Central-South-African | 2012-01-01 | OL898666.1 | East-Central-South-African | 2021-02-25 |
| MF076573.1 | East-Central-South-African | 2012-08-07 | OL898672.1 | East-Central-South-African | 2021-02-25 |
| MF076574.1 | East-Central-South-African | 2012-08-16 | OL898698.1 | East-Central-South-African | 2021-02-25 |
| MF076575.1 | East-Central-South-African | 2012-08-16 | OL898678.1 | East-Central-South-African | 2021-03-05 |
| MF076576.1 | East-Central-South-African | 2012-08-31 | OL999094.1 | East-Central-South-African | 2021-03-05 |
| MH647184.1 | East-Central-South-African | 2012-10-01 | OL898692.1 | East-Central-South-African | 2021-03-09 |
| MH647186.1 | East-Central-South-African | 2012-11-01 | OL898673.1 | East-Central-South-African | 2021-03-15 |
| MH647187.1 | East-Central-South-African | 2013-02-01 | OL898680.1 | East-Central-South-African | 2021-03-22 |

| Accession  | Lineage                    | Date       | Accession  | Lineage                    | Date       |
|------------|----------------------------|------------|------------|----------------------------|------------|
| MH647217.1 | East-Central-South-African | 2013-02-01 | OL898688.1 | East-Central-South-African | 2021-03-23 |
| MH647218.1 | East-Central-South-African | 2013-03-01 | OL898686.1 | East-Central-South-African | 2021-03-25 |
| MF076572.1 | East-Central-South-African | 2013-03-12 | OL898695.1 | East-Central-South-African | 2021-04-04 |
| MF076568.1 | East-Central-South-African | 2013-03-28 | OL898703.1 | East-Central-South-African | 2021-04-06 |
| MF076569.1 | East-Central-South-African | 2013-03-28 | OL898679.1 | East-Central-South-African | 2021-04-13 |
| MF076570.1 | East-Central-South-African | 2013-03-28 | OL898687.1 | East-Central-South-African | 2021-04-16 |
| MF076571.1 | East-Central-South-African | 2013-03-28 | OL898702.1 | East-Central-South-African | 2021-04-27 |
| MH647188.1 | East-Central-South-African | 2013-04-01 | OL898713.1 | East-Central-South-African | 2021-04-29 |
| MH647189.1 | East-Central-South-African | 2013-04-01 | OL898701.1 | East-Central-South-African | 2021-05-05 |
| MH647190.1 | East-Central-South-African | 2013-05-01 | OL898708.1 | East-Central-South-African | 2021-05-05 |
| MH647191.1 | East-Central-South-African | 2013-05-01 | OL898715.1 | East-Central-South-African | 2021-05-06 |
| MH647192.1 | East-Central-South-African | 2013-05-01 | OL898694.1 | East-Central-South-African | 2021-05-11 |
| MH647194.1 | East-Central-South-African | 2013-06-01 | OL898709.1 | East-Central-South-African | 2021-05-12 |
| MH647209.1 | East-Central-South-African | 2013-06-01 | OL999095.1 | East-Central-South-African | 2021-05-24 |
| MH647195.1 | East-Central-South-African | 2013-07-01 | MG649979.1 | East-Central-South-African | 2017-03    |
| MH647196.1 | East-Central-South-African | 2013-08-01 | HM045786.1 | West African               | 1964-07-07 |
| MH647197.1 | East-Central-South-African | 2013-10-01 | HM045798.1 | West African               | 1966-11-01 |

**Table S2.** Full details of the 186 complete and near-complete CHIKV genome sequences from the ECSA genotype samples in Brazil and Americas used in this study.

| <b>Acession Number</b> | <b>State</b>   | <b>Country</b> | <b>Collection date</b> |
|------------------------|----------------|----------------|------------------------|
| KP164568.1             | Bahia          | Brazil         | 2014-08-26             |
| KP164569.1             | Bahia          | Brazil         | 2014-08-28             |
| KP164570.1             | Bahia          | Brazil         | 2014-09-03             |
| MK121891.1             | Amazonas       | Brazil         | 2015-07-10             |
| MK121892.1             | Amazonas       | Brazil         | 2015-07-11             |
| MK121893.1             | Amazonas       | Brazil         | 2015-07-15             |
| KU940225.1             | Bahia          | Brazil         | 2015-07-15             |
| MG649984.1             | Rio de Janeiro | Brazil         | 1905-07-07             |
| MG649985.1             | Rio de Janeiro | Brazil         | 1905-07-07             |
| MK121894.1             | Amazonas       | Brazil         | 2016-01-27             |
| KY055011.1             | Sergipe        | Brazil         | 2016-02-20             |
| KX228391.1             | Pernambuco     | Brazil         | 2016-03-03             |
| KY124328.1             | Rio de Janeiro | Brazil         | 2016-03-16             |
| KY124329.1             | Rio de Janeiro | Brazil         | 2016-03-16             |
| MN783352.1             | Bahia          | Brazil         | 2016-04-01             |
| MK244638.1             | Rio de Janeiro | Brazil         | 2016-04-05             |
| KY704952.1             | Alagoas        | Brazil         | 2016-04-07             |
| KY704942.1             | Alagoas        | Brazil         | 2016-04-14             |
| KY704947.1             | Alagoas        | Brazil         | 2016-04-15             |
| KY704939.1             | Alagoas        | Brazil         | 2016-04-17             |
| MK244634.1             | Rio de Janeiro | Brazil         | 2016-04-27             |
| MK244636.1             | Rio de Janeiro | Brazil         | 2016-05-02             |
| MK244633.1             | Rio de Janeiro | Brazil         | 2016-05-06             |
| KY704955.1             | Joao Pessoa    | Brazil         | 2016-06-17             |
| KY704954.1             | Joao Pessoa    | Brazil         | 2016-06-20             |
| MG649971.1             | Rio de Janeiro | Brazil         | 2016-08-22             |
| MN783353.1             | Bahia          | Brazil         | 2016-10-13             |
| MH823663.1             | Mato Grosso    | Brazil         | 2017-01-05             |
| MH823668.1             | Mato Grosso    | Brazil         | 2017-01-05             |
| MK121898.1             | Roraima        | Brazil         | 2017-02-22             |
| MK121906.1             | Roraima        | Brazil         | 2017-02-27             |
| MK121907.1             | Roraima        | Brazil         | 2017-02-27             |
| MH823666.1             | Mato Grosso    | Brazil         | 2017-03-01             |
| MH823667.1             | Mato Grosso    | Brazil         | 2017-03-01             |
| MK121904.1             | Roraima        | Brazil         | 2017-03-02             |
| MK121896.1             | Roraima        | Brazil         | 2017-03-03             |
| MK121908.1             | Roraima        | Brazil         | 2017-03-05             |
| MK244640.1             | Rio de Janeiro | Brazil         | 2017-03-07             |
| MK121903.1             | Roraima        | Brazil         | 2017-03-15             |
| MH823664.1             | Mato Grosso    | Brazil         | 2017-03-16             |
| MH823665.1             | Mato Grosso    | Brazil         | 2017-03-16             |
| MG649978.1             | Rio de Janeiro | Brazil         | 2017-03-16             |
| MK121899.1             | Roraima        | Brazil         | 2017-03-17             |
| MK121900.1             | Roraima        | Brazil         | 2017-03-17             |



| <b>Acession Number</b> | <b>State</b>         | <b>Country</b> | <b>Collection date</b> |
|------------------------|----------------------|----------------|------------------------|
| MK121901.1             | Roraima              | Brazil         | 2017-03-17             |
| MK121902.1             | Roraima              | Brazil         | 2017-03-17             |
| MK121895.1             | Amazonas             | Brazil         | 2017-03-18             |
| MG649982.1             | Rio de Janeiro       | Brazil         | 2017-03-24             |
| MK518395.1             | Maranhão             | Brazil         | 2017-05-16             |
| MK752955.1             | Bahia                | Brazil         | 2017-06-05             |
| MK752954.1             | Bahia                | Brazil         | 2017-06-22             |
| MK752951.1             | Bahia                | Brazil         | 2017-07-27             |
| MN428506.1             | Mato Grosso          | Brazil         | 2018-02-01             |
| MK156060.1             | Bahia                | Brazil         | 2018-02-08             |
| MK244642.1             | Rio de Janeiro       | Brazil         | 2018-02-18             |
| MN428504.1             | Mato Grosso          | Brazil         | 2018-02-23             |
| MN428524.1             | Mato Grosso          | Brazil         | 2018-03-06             |
| MN428525.1             | Mato Grosso          | Brazil         | 2018-03-06             |
| MN428526.1             | Mato Grosso          | Brazil         | 2018-03-06             |
| MN428527.1             | Mato Grosso          | Brazil         | 2018-03-06             |
| MN428518.1             | Mato Grosso          | Brazil         | 2018-03-08             |
| MN428522.1             | Mato Grosso          | Brazil         | 2018-03-08             |
| MN428523.1             | Mato Grosso          | Brazil         | 2018-03-08             |
| MN428520.1             | Mato Grosso          | Brazil         | 2018-03-09             |
| MK156063.1             | Bahia                | Brazil         | 2018-03-09             |
| MK156064.1             | Bahia                | Brazil         | 2018-03-09             |
| MN428512.1             | Mato Grosso          | Brazil         | 2018-03-13             |
| MN428519.1             | Mato Grosso          | Brazil         | 2018-03-16             |
| MN428521.1             | Mato Grosso          | Brazil         | 2018-03-16             |
| MN428517.1             | Mato Grosso          | Brazil         | 2018-03-17             |
| MN428515.1             | Mato Grosso          | Brazil         | 2018-03-20             |
| MN428516.1             | Mato Grosso          | Brazil         | 2018-03-23             |
| MK244644.1             | Rio de Janeiro       | Brazil         | 2018-03-26             |
| MK244647.1             | Rio de Janeiro       | Brazil         | 2018-03-27             |
| MN428511.1             | Mato Grosso          | Brazil         | 2018-04-18             |
| MN428510.1             | Mato Grosso          | Brazil         | 2018-04-25             |
| MN428513.1             | Mato Grosso          | Brazil         | 2018-04-26             |
| MN428508.1             | Mato Grosso          | Brazil         | 2018-04-27             |
| MN428505.1             | Mato Grosso          | Brazil         | 2018-05-21             |
| MT038399.1             | Pedro Juan Caballero | Paraguay       | 2018-06-25             |
| MT038401.1             | Pedro Juan Caballero | Paraguay       | 2018-06-25             |
| MT038402.1             | Bella Vista          | Paraguay       | 2018-07-03             |
| MN428507.1             | Mato Grosso          | Brazil         | 2018-07-05             |
| MT038403.1             | Bella Vista          | Paraguay       | 2018-07-10             |
| MK156058.1             | Bahia                | Brazil         | 2018-07-30             |
| MK156062.1             | Bahia                | Brazil         | 2018-08-20             |
| MK156055.1             | Bahia                | Brazil         | 2018-08-21             |
| MK156054.1             | Bahia                | Brazil         | 2018-08-24             |
| MK156061.1             | Bahia                | Brazil         | 2018-08-29             |
| MT933029.1             | Rio de Janeiro       | Brazil         | 2019-01-21             |
| MT933030.1             | Rio de Janeiro       | Brazil         | 2019-01-28             |

| <b>Acession Number</b> | <b>State</b>        | <b>Country</b> | <b>Collection date</b> |
|------------------------|---------------------|----------------|------------------------|
| MT933032.1             | Rio de Janeiro      | Brazil         | 2019-02-05             |
| MT933033.1             | Rio de Janeiro      | Brazil         | 2019-03-08             |
| MW260512.1             | Rio Grande do Norte | Brazil         | 2019-03-23             |
| MW260513.1             | Rio Grande do Norte | Brazil         | 2019-03-23             |
| MW260515.1             | Rio Grande do Norte | Brazil         | 2019-03-27             |
| MW260514.1             | Rio Grande do Norte | Brazil         | 2019-03-28             |
| MW260516.1             | Rio Grande do Norte | Brazil         | 2019-03-28             |
| MW260517.1             | Rio Grande do Norte | Brazil         | 2019-03-29             |
| MW260518.1             | Rio Grande do Norte | Brazil         | 2019-03-30             |
| MW260519.1             | Rio Grande do Norte | Brazil         | 2019-03-30             |
| MT933035.1             | Rio de Janeiro      | Brazil         | 2019-04-17             |
| MT933036.1             | Rio de Janeiro      | Brazil         | 2019-04-17             |
| MT933038.1             | Rio de Janeiro      | Brazil         | 2019-04-22             |
| MT933039.1             | Rio de Janeiro      | Brazil         | 2019-05-06             |
| MT933041.1             | Rio de Janeiro      | Brazil         | 2019-05-08             |
| MT933051.1             | Rio de Janeiro      | Brazil         | 2019-05-28             |
| MT933043.1             | Rio de Janeiro      | Brazil         | 2019-06-07             |
| MT933044.1             | Rio de Janeiro      | Brazil         | 2019-06-13             |
| MT933046.1             | Rio de Janeiro      | Brazil         | 2019-07-01             |
| MT933049.1             | Rio de Janeiro      | Brazil         | 2019-07-07             |
| OL898663.1             | São Paulo           | Brazil         | 2020-09-05             |
| OL898714.1             | São Paulo           | Brazil         | 2020-11-20             |
| OL898669.1             | São Paulo           | Brazil         | 2020-12-17             |
| OL898675.1             | São Paulo           | Brazil         | 2020-12-26             |
| OL898682.1             | São Paulo           | Brazil         | 2021-01-07             |
| OL898707.1             | São Paulo           | Brazil         | 2021-01-07             |
| OL898689.1             | São Paulo           | Brazil         | 2021-01-15             |
| OL898690.1             | São Paulo           | Brazil         | 2021-01-16             |
| OL898696.1             | São Paulo           | Brazil         | 2021-01-28             |
| OL898704.1             | São Paulo           | Brazil         | 2021-01-28             |
| OL898664.1             | São Paulo           | Brazil         | 2021-01-31             |
| OL898667.1             | São Paulo           | Brazil         | 2021-02-01             |
| OL898670.1             | São Paulo           | Brazil         | 2021-02-02             |
| OL898676.1             | São Paulo           | Brazil         | 2021-02-02             |
| OL898710.1             | São Paulo           | Brazil         | 2021-02-02             |
| OL898711.1             | São Paulo           | Brazil         | 2021-02-08             |
| OL898697.1             | São Paulo           | Brazil         | 2021-02-09             |
| OL898699.1             | São Paulo           | Brazil         | 2021-02-09             |
| OL898706.1             | São Paulo           | Brazil         | 2021-02-09             |
| OL898677.1             | São Paulo           | Brazil         | 2021-02-13             |
| OL898693.1             | São Paulo           | Brazil         | 2021-02-13             |
| OL898705.1             | São Paulo           | Brazil         | 2021-02-13             |
| OL898684.1             | São Paulo           | Brazil         | 2021-02-14             |
| OL898671.1             | São Paulo           | Brazil         | 2021-02-16             |
| OL898712.1             | São Paulo           | Brazil         | 2021-02-18             |
| OL898681.1             | São Paulo           | Brazil         | 2021-02-20             |
| OL898691.1             | São Paulo           | Brazil         | 2021-02-21             |

| <b>Acession Number</b> | <b>State</b> | <b>Country</b> | <b>Collection date</b> |
|------------------------|--------------|----------------|------------------------|
| OL898665.1             | São Paulo    | Brazil         | 2021-02-22             |
| OL898685.1             | São Paulo    | Brazil         | 2021-02-22             |
| OL898666.1             | São Paulo    | Brazil         | 2021-02-25             |
| OL898672.1             | São Paulo    | Brazil         | 2021-02-25             |
| OL898698.1             | São Paulo    | Brazil         | 2021-02-25             |
| OL898678.1             | São Paulo    | Brazil         | 2021-03-05             |
| OL898692.1             | São Paulo    | Brazil         | 2021-03-09             |
| OL898673.1             | São Paulo    | Brazil         | 2021-03-15             |
| OL898688.1             | São Paulo    | Brazil         | 2021-03-23             |
| OL898686.1             | São Paulo    | Brazil         | 2021-03-25             |
| OL898695.1             | São Paulo    | Brazil         | 2021-04-04             |
| OL898703.1             | São Paulo    | Brazil         | 2021-04-06             |
| OL898679.1             | São Paulo    | Brazil         | 2021-04-13             |
| OL898687.1             | São Paulo    | Brazil         | 2021-04-16             |
| OL898702.1             | São Paulo    | Brazil         | 2021-04-27             |
| OL898713.1             | São Paulo    | Brazil         | 2021-04-29             |
| OL898701.1             | São Paulo    | Brazil         | 2021-05-05             |
| OL898708.1             | São Paulo    | Brazil         | 2021-05-05             |
| OL898715.1             | São Paulo    | Brazil         | 2021-05-06             |
| OL898694.1             | São Paulo    | Brazil         | 2021-05-11             |
| OL898709.1             | São Paulo    | Brazil         | 2021-05-12             |
| TO-UFT-245             | Tocantins    | Brazil         | 2021-09-14             |
| TO-UFT-7124            | Tocantins    | Brazil         | 2021-07-30             |
| TO-UFT-252             | Tocantins    | Brazil         | 2021-10-08             |
| TO-UFT-5070            | Tocantins    | Brazil         | 2021-11-18             |
| TO-UFT-22529           | Tocantins    | Brazil         | 2022-01-21             |
| TO-UFT-33522           | Tocantins    | Brazil         | 2022-01-22             |
| TO-UFT-67522           | Tocantins    | Brazil         | 2022-01-24             |
| TO-UFT-5531            | Tocantins    | Brazil         | 2022-01-25             |
| TO-UFT-18531           | Tocantins    | Brazil         | 2022-01-26             |
| TO-UFT-32531           | Tocantins    | Brazil         | 2022-01-26             |
| TO-UFT-50531           | Tocantins    | Brazil         | 2022-01-31             |
| TO-UFT-52531           | Tocantins    | Brazil         | 2022-01-31             |
| TO-UFT-72569           | Tocantins    | Brazil         | 2022-02-07             |
| TO-UFT-86569           | Tocantins    | Brazil         | 2022-02-07             |
| TO-UFT-64569           | Tocantins    | Brazil         | 2022-02-09             |
| TO-UFT-9217            | Tocantins    | Brazil         | 2022-05-27             |
| TO-UFT-9317            | Tocantins    | Brazil         | 2022-05-26             |
| TO-UFT-2017            | Tocantins    | Brazil         | 2022-05-29             |
| TO-UFT-4345            | Tocantins    | Brazil         | 2022-06-21             |
| TO-UFT-8545            | Tocantins    | Brazil         | 2022-06-22             |
| TO-UFT-3045            | Tocantins    | Brazil         | 2022-06-24             |
| TO-UFT-6145            | Tocantins    | Brazil         | 2022-06-24             |
| TO-UFT-4945            | Tocantins    | Brazil         | 2022-06-26             |
| TO-UFT-2447            | Tocantins    | Brazil         | 2022-07-14             |
| TO-UFT-2645            | Tocantins    | Brazil         | 2022-07-20             |
| TO-UFT-6747            | Tocantins    | Brazil         | 2022-07-23             |

| Acession Number | State     | Country | Collection date |
|-----------------|-----------|---------|-----------------|
| TO-UFT-447      | Tocantins | Brazil  | 2022-07-24      |

**Table S3.** Synonymous and missense mutations found in the 27 new CHIKV genomes from Tocantins state.

[illegible]

[illegible]

| POS  | REF | ALT | Effect     | TO-UFT-18531 | TO-UFT-2017 | TO-UFT-22529 | TO-UFT-2447 | TO-UFT-245 | TO-UFT-252 | TO-UFT-2645 | TO-UFT-3045 | TO-UFT-32531 | TO-UFT-33522 | TO-UFT-4345 | TO-UFT-447 | TO-UFT-4945 | TO-UFT-50531 | TO-UFT-5070 | TO-UFT-52531 | TO-UFT-5531 | TO-UFT-6146 | TO-UFT-64569 | TO-UFT-6747 | TO-UFT-67522 | TO-UFT-7124 | TO-UFT-72569 | TO-UFT-8545 | TO-UFT-86569 | TO-UFT-9217 | TO-UFT-9317 |
|------|-----|-----|------------|--------------|-------------|--------------|-------------|------------|------------|-------------|-------------|--------------|--------------|-------------|------------|-------------|--------------|-------------|--------------|-------------|-------------|--------------|-------------|--------------|-------------|--------------|-------------|--------------|-------------|-------------|
| 4994 | T   | C   | synonymous | 0            | 0           | 0            | 0           | 0          | 0          | 0           | 0           | 0            | 0            | 0           | 0          | 0           | 0            | 0           | 0            | 0           | 0           | 0            | 0           | 1            | 0           | 0            | 0           | 0            | 0           | 0           |
| 5068 | C   | A   | missense   | 0            | 0           | 0            | 0           | 0          | 0          | 0           | 0           | 0            | 0            | 0           | 0          | 0           | 0            | 1           | 0            | 0           | 0           | 0            | 0           | 0            | 0           | 0            | 0           | 0            | 0           | 0           |
| 5081 | T   | C   | synonymous | 1            | 1           | 1            | 1           | 1          | 1          | 1           | 1           | 1            | 1            | 1           | 1          | 1           | 1            | 1           | 1            | 1           | 1           | 1            | 1           | 0            | 1           | 1            | 1           | 1            | 1           | 1           |
| 5165 | C   | T   | synonymous | 0            | 0           | 0            | 0           | 0          | 0          | 0           | 0           | 0            | 0            | 0           | 0          | 0           | 0            | 0           | 0            | 0           | 1           | 0            | 0           | 0            | 0           | 0            | 0           | 0            | 0           | 0           |
| 5238 | G   | A   | missense   | 0            | 1           | 1            | 1           | 0          | 0          | 1           | 1           | 1            | 1            | 1           | 1          | 1           | 1            | 0           | 1            | 1           | 1           | 1            | 1           | 0            | 0           | 1            | 1           | 1            | 1           | 1           |
| 5276 | G   | A   | synonymous | 0            | 1           | 1            | 1           | 1          | 1          | 1           | 1           | 1            | 1            | 1           | 1          | 1           | 1            | 1           | 1            | 1           | 1           | 1            | 1           | 0            | 1           | 1            | 1           | 1            | 1           | 1           |
| 5377 | T   | C   | missense   | 0            | 1           | 1            | 1           | 1          | 1          | 1           | 1           | 1            | 1            | 1           | 1          | 1           | 1            | 1           | 1            | 1           | 1           | 1            | 1           | 0            | 1           | 1            | 1           | 1            | 1           | 1           |
| 5449 | C   | T   | missense   | 0            | 0           | 0            | 0           | 0          | 0          | 0           | 0           | 0            | 0            | 0           | 0          | 0           | 0            | 0           | 0            | 0           | 0           | 0            | 1           | 0            | 0           | 0            | 0           | 0            | 0           | 1           |
| 5465 | T   | C   | synonymous | 0            | 1           | 0            | 1           | 1          | 1          | 1           | 1           | 1            | 1            | 1           | 1          | 1           | 1            | 1           | 1            | 1           | 1           | 1            | 1           | 0            | 1           | 1            | 1           | 1            | 1           | 1           |
| 5489 | A   | G   | synonymous | 0            | 0           | 0            | 0           | 1          | 0          | 0           | 0           | 0            | 0            | 0           | 0          | 0           | 0            | 0           | 0            | 0           | 0           | 0            | 0           | 0            | 0           | 0            | 0           | 0            | 0           | 0           |
| 5582 | C   | T   | synonymous | 0            | 0           | 0            | 0           | 1          | 0          | 0           | 0           | 0            | 0            | 0           | 0          | 0           | 0            | 0           | 0            | 0           | 0           | 0            | 0           | 0            | 0           | 0            | 0           | 0            | 0           | 0           |
| 5646 | T   | C   | synonymous | 0            | 1           | 0            | 1           | 1          | 1          | 1           | 1           | 1            | 1            | 1           | 1          | 1           | 1            | 1           | 1            | 1           | 1           | 1            | 1           | 0            | 1           | 1            | 1           | 1            | 1           | 1           |
| 5714 | A   | G   | synonymous | 0            | 0           | 0            | 0           | 1          | 1          | 0           | 0           | 0            | 0            | 0           | 0          | 0           | 1            | 0           | 0            | 0           | 0           | 0            | 0           | 0            | 1           | 0            | 0           | 0            | 0           | 0           |
| 5782 | A   | G   | missense   | 0            | 1           | 0            | 0           | 0          | 0          | 0           | 0           | 0            | 0            | 0           | 0          | 0           | 0            | 0           | 0            | 0           | 0           | 0            | 0           | 0            | 0           | 1            | 0           | 0            | 0           | 0           |
| 5918 | T   | C   | synonymous | 0            | 0           | 0            | 0           | 0          | 0          | 0           | 0           | 0            | 0            | 0           | 0          | 0           | 0            | 1           | 0            | 0           | 0           | 0            | 0           | 0            | 0           | 0            | 0           | 0            | 0           | 0           |
| 5941 | C   | A   | missense   | 0            | 0           | 0            | 0           | 0          | 0          | 0           | 0           | 0            | 0            | 0           | 0          | 0           | 1            | 0           | 0            | 0           | 0           | 0            | 0           | 0            | 0           | 0            | 0           | 0            | 0           | 0           |
| 6009 | C   | T   | synonymous | 0            | 0           | 0            | 0           | 1          | 1          | 0           | 0           | 1            | 1            | 0           | 0          | 0           | 0            | 1           | 1            | 1           | 0           | 1            | 0           | 0            | 1           | 0            | 0           | 1            | 0           | 0           |
| 6359 | C   | T   | synonymous | 0            | 0           | 0            | 0           | 0          | 0          | 0           | 0           | 0            | 0            | 0           | 0          | 0           | 0            | 0           | 0            | 0           | 0           | 0            | 1           | 0            | 0           | 0            | 0           | 0            | 0           | 0           |
| 6500 | G   | A   | synonymous | 0            | 0           | 0            | 0           | 1          | 0          | 0           | 0           | 0            | 0            | 0           | 0          | 0           | 0            | 0           | 0            | 0           | 0           | 0            | 0           | 0            | 0           | 0            | 0           | 0            | 0           | 0           |
| 6615 | C   | T   | missense   | 0            | 0           | 0            | 0           | 0          | 0          | 0           | 0           | 0            | 0            | 0           | 0          | 0           | 0            | 0           | 0            | 0           | 0           | 0            | 0           | 0            | 0           | 0            | 0           | 1            | 0           | 0           |
| 6734 | C   | T   | synonymous | 1            | 1           | 1            | 1           | 1          | 1          | 1           | 0           | 1            | 1            | 1           | 0          | 1           | 1            | 1           | 1            | 1           | 1           | 1            | 0           | 1            | 1           | 1            | 0           | 1            | 1           | 0           |
| 6905 | C   | T   | synonymous | 0            | 0           | 0            | 0           | 0          | 0          | 0           | 0           | 1            | 0            | 0           | 0          | 0           | 0            | 0           | 0            | 0           | 0           | 0            | 0           | 0            | 0           | 0            | 0           | 0            | 0           | 0           |
| 7108 | C   | A   | missense   | 1            | 1           | 1            | 1           | 1          | 1          | 1           | 1           | 1            | 1            | 1           | 1          | 1           | 1            | 1           | 1            | 1           | 1           | 1            | 1           | 1            | 1           | 1            | 1           | 1            | 1           | 1           |
| 7226 | C   | T   | synonymous | 0            | 0           | 0            | 0           | 0          | 0          | 0           | 0           | 0            | 0            | 0           | 0          | 0           | 1            | 0           | 0            | 0           | 0           | 0            | 0           | 0            | 0           | 0            | 0           | 0            | 0           | 0           |
| 7272 | C   | T   | synonymous | 0            | 1           | 0            | 1           | 1          | 1          | 0           | 0           | 0            | 0            | 1           | 0          | 0           | 0            | 0           | 0            | 1           | 0           | 0            | 0           | 0            | 1           | 0            | 0           | 0            | 0           | 0           |

[illegible]



| POS   | REF | ALT | Effect     | TO-UFT-18531 | TO-UFT-2017 | TO-UFT-22529 | TO-UFT-2447 | TO-UFT-245 | TO-UFT-252 | TO-UFT-2645 | TO-UFT-3045 | TO-UFT-32531 | TO-UFT-33522 | TO-UFT-4345 | TO-UFT-447 | TO-UFT-4945 | TO-UFT-50531 | TO-UFT-5070 | TO-UFT-52531 | TO-UFT-5531 | TO-UFT-6146 | TO-UFT-64569 | TO-UFT-6747 | TO-UFT-67522 | TO-UFT-7124 | TO-UFT-72569 | TO-UFT-8545 | TO-UFT-86569 | TO-UFT-9217 | TO-UFT-9317 |
|-------|-----|-----|------------|--------------|-------------|--------------|-------------|------------|------------|-------------|-------------|--------------|--------------|-------------|------------|-------------|--------------|-------------|--------------|-------------|-------------|--------------|-------------|--------------|-------------|--------------|-------------|--------------|-------------|-------------|
| 10286 | GCT | AC  | missense   | 1            | 1           | 0            | 1           | 0          | 0          | 1           | 1           | 1            | 1            | 1           | 1          | 0           | 1            | 0           | 1            | 0           | 1           | 0            | 1           | 1            | 0           | 1            | 1           | 0            | 1           | 1           |
| 10288 | T   | C   | synonymous | 0            | 0           | 0            | 0           | 0          | 0          | 0           | 0           | 0            | 0            | 0           | 0          | 0           | 0            | 1           | 0            | 0           | 0           | 0            | 0           | 0            | 0           | 0            | 0           | 0            | 0           | 0           |
| 10626 | A   | C   | missense   | 1            | 1           | 1            | 1           | 1          | 1          | 1           | 1           | 1            | 1            | 1           | 1          | 1           | 1            | 1           | 1            | 1           | 1           | 1            | 1           | 1            | 1           | 1            | 1           | 1            | 1           | 1           |
| 10745 | C   | T   | synonymous | 0            | 0           | 0            | 0           | 0          | 0          | 0           | 1           | 0            | 0            | 0           | 0          | 0           | 0            | 0           | 0            | 0           | 0           | 0            | 0           | 0            | 0           | 0            | 0           | 0            | 0           | 0           |
| 10799 | G   | A   | missense   | 1            | 1           | 1            | 1           | 1          | 1          | 1           | 1           | 1            | 1            | 1           | 1          | 1           | 1            | 1           | 1            | 1           | 1           | 1            | 1           | 1            | 1           | 1            | 1           | 1            | 1           | 1           |
| 10907 | G   | A   | missense   | 1            | 1           | 0            | 1           | 1          | 1          | 1           | 1           | 1            | 1            | 1           | 1          | 1           | 1            | 1           | 1            | 1           | 1           | 1            | 1           | 1            | 1           | 1            | 1           | 1            | 1           | 1           |
| 10930 | C   | T   | synonymous | 0            | 1           | 0            | 0           | 0          | 0          | 1           | 1           | 0            | 0            | 0           | 0          | 0           | 0            | 0           | 0            | 0           | 0           | 0            | 1           | 0            | 0           | 0            | 1           | 0            | 0           | 1           |
| 11008 | A   | T   | synonymous | 1            | 1           | 0            | 1           | 0          | 0          | 1           | 1           | 1            | 1            | 1           | 1          | 0           | 1            | 0           | 1            | 0           | 1           | 1            | 1           | 1            | 0           | 1            | 1           | 1            | 1           | 1           |
| 11091 | G   | T   | missense   | 0            | 0           | 0            | 0           | 0          | 0          | 0           | 0           | 0            | 0            | 0           | 0          | 0           | 0            | 0           | 0            | 0           | 0           | 1            | 0           | 0            | 0           | 0            | 0           | 0            | 0           | 1           |
| 11257 | C   | T   | synonymous | 0            | 0           | 0            | 0           | 1          | 0          | 0           | 0           | 0            | 0            | 0           | 0          | 0           | 0            | 0           | 0            | 0           | 0           | 0            | 0           | 0            | 0           | 0            | 0           | 0            | 0           | 0           |
| 11302 | C   | T   | synonymous | 0            | 0           | 0            | 0           | 1          | 1          | 0           | 0           | 0            | 0            | 0           | 0          | 0           | 0            | 1           | 0            | 0           | 0           | 0            | 0           | 0            | 1           | 0            | 0           | 0            | 0           | 0           |
